# Supplementary material for: A new fully heterogeneous synthesis of pyrrole-2-acetic acid derivatives
Source: Royal Society of Chemistry journal article supplement (doi:10.1039/c6ra05348c), 2016-01-01

## Supporting Information

### General Remarks

<sup>1</sup>H-NMR were recorded at 400 MHz on a VarianMercury Plus 400. <sup>13</sup>C-NMR were recorded at 100 MHz. IR spectra were recorded with a PerkinElmer Paragon 500 FT-IR. Mass spectra were performed on a GC/MS system by means of the EI technique (70 eV). Microanalyses were performed with a CHNS-O analyzer Model EA 1108 from Fisons Instruments.

### General Procedure for the preparation of compounds 4.

A mixture of β-nitroacrylate **1** (1 mmol) and pyrrole **2** (1 mmol) was stirred under solvent-free conditions, at room temperature, for three hours. Then, acetonitrile (4 mL) and TBD (2 mmol, 667 mg) were added and the solution was heated at 50°C and stirred for further 2 hours. Terminate the reaction (monitored by TLC), the promoter was filtered off and washed with EtOAc. Finally, after the evaporation of the solvent under vacuum, the crude product **4** was purified by flash chromatography column.

### General Procedure for the preparation of compounds 5 or 6.

A mixture of β-nitroacrylate **1** (1 mmol) and pyrrole **2** (1 mmol) was stirred under solvent-free conditions, at room temperature, for three hours. Then, acetonitrile (4 mL) and TBD (2 mmol, 667 mg) were added and the solution was heated at 50°C and stirred for 2 hours. Terminate the reaction (monitored by TLC), the promoter was filtered off and washed with EtOAc. At that point, after the evaporation of the solvent under vacuum, the crude product was dissolved in EtOH (7 mL), treated with ammonium formate (HCOONH<sub>4</sub>, 4 mmol), 10% Pd/C (100 mg) and stirred at 70°C for further two hours. Finally, the catalyst was removed by filtration and washed with EtOAc, then after the evaporation of the solvent under vacuum, the crude product **5** (or **6**) was purified by flash chromatography column.

### Spectroscopic data of compounds 4

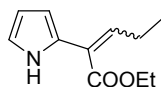

**Compound 4aa.** Yield 75% (dr: *E/Z* = 80:20).

(*E*)-Diastereoisomer. Yellow oil. IR (cm<sup>-1</sup>, neat): 721, 773, 805, 1118, 1207, 1445, 1614, 1696, 2949, 3411. <sup>1</sup>H-NMR (CDCl<sub>3</sub>, 400MHz) δ: 1.17 (t, 3H, *J* = 7.5 Hz), 1.37 (t, 3H, *J* = 7.3 Hz), 2.44-2.61 (m, 2H), 4.30 (q, 2H, *J* = 7.3 Hz), 6.24-6.36 (m, 2H), 6.81 (t, 1H, *J* = 7.0 Hz), 6.83-6.88 (m, 1H), 9.88 (br s, 1H). <sup>13</sup>C-NMR (CDCl<sub>3</sub>, 100MHz) δ: 13.8, 14.4, 23.7, 61.2, 108.8, 110.8, 117.9, 123.4, 125.9, 143.1, 168.3. GC-MS (70 eV): *m/z*: 193 ([M<sup>+</sup>], 47), 164 (22), 146 (67), 132 (17), 118 (100), 104 (31), 92 (33), 91 (32), 77 (17), 65 (15), 51 (11), 39 (12), 29 (12). Anal. Calcd. for C<sub>11</sub>H<sub>15</sub>NO<sub>2</sub> (193.25): C, 68.37; H, 7.82; N, 7.25. Found: C, 68.46; H, 7.88; N, 7.19.

(*Z*)-Diastereoisomer. Yellow oil. IR (cm<sup>-1</sup>, neat): 722, 771, 804, 1109, 1217, 1451, 1616, 1698, 2955, 3414. <sup>1</sup>H-NMR (CDCl<sub>3</sub>, 400MHz) δ: 1.11 (t, 3H, *J* = 7.7 Hz), 1.38 (t, 3H, *J* = 7.3 Hz), 2.43-2.57 (m, 2H), 4.33 (q, 2H, *J* = 7.3 Hz), 6.16-6.37 (m, 3H), 6.74-6.79 (m, 1H), 9.27 (br s, 1H). <sup>13</sup>C-NMR (CDCl<sub>3</sub>, 100MHz) δ: 14.2, 14.5, 23.8, 61.2, 106.0, 109.3, 118.1, 124.5, 129.4, 139.6, 168.0. GC-MS (70 eV): *m/z*: 193 ([M<sup>+</sup>], 42), 164 (21), 146 (64), 132 (18), 118 (100), 104 (29), 92 (28), 91 (29), 77 (17), 65 (13), 51 (8), 39 (10), 29 (10). Anal. Calcd. for C<sub>11</sub>H<sub>15</sub>NO<sub>2</sub> (193.25): C, 68.37; H, 7.82; N, 7.25. Found: C, 68.43; H, 7.86; N, 7.21.

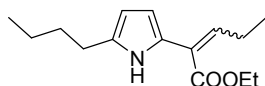

**Compound 4ab.** Yield 87% (dr: *E/Z* = 70:30; inseparable diastereomeric mixture).

Yellow oil. IR (cm<sup>-1</sup>, neat): 803, 1121, 1214, 1451, 1618, 1699, 2954, 3413. <sup>1</sup>H-NMR (CDCl<sub>3</sub>, 400MHz) δ: 0.85-0.97 (m, 3H), 1.09 (t, 0.9H, *J* = 7.3), 1.15 (t, 2.1H, *J* = 7.7), 1.32-1.45 (m, 5H), 1.55-1.69 (m, 2H), 2.41-2.54 (m, 2H), 2.55-2.66 (m, 2H), 4.22-4.35 (m, 2H), 5.84-5.87 (m, 0.3H), 5.92-5.97 (m, 0.7H), 6.17-6.22 (m, 1H), 6.24 (t, 0.3H, *J* = 7.7), 6.71 (t, 0.7H, *J* = 7), 8.88 (br s, 0.3H), 9.67 (br s, 0.7H). <sup>13</sup>C-NMR (CDCl<sub>3</sub>, 100MHz) δ: 14.0, 14.1, 14.3, 14.4, 14.5, 22.6, 22.7, 23.6, 23.9, 27.7, 27.8, 31.9, 32.0, 61.1, 61.2, 105.8, 106.1, 106.2, 111.1, 123.1, 124.4, 124.7, 127.7, 133.4, 133.7, 137.6, 142.0, 168.2, 168.6. GC-MS (70 eV): *m/z*: (*E*)-Diastereoisomer: 249([M<sup>+</sup>], 50), 220 (31), 206 (49), 202 (76), 176 (25), 160 (100), 132 (81), 117 (60), 104 (56), 91 (22), 77 (28), 41 (24), 29 (44). (*Z*)-Diastereoisomer: 249([M<sup>+</sup>], 90), 220 (43), 206 (69), 202 (100), 176 (23), 160 (92), 132 (48), 117 (28), 104 (23), 91 (9), 77 (9), 41 (6), 29 (10). Anal. Calcd. for C<sub>15</sub>H<sub>23</sub>NO<sub>2</sub> (249.35): C, 72.25; H, 9.30; N, 5.62. Found: C, 72.32; H, 9.36; N, 5.59.

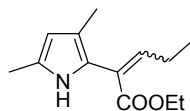

**Compound 4ac.** Yield 85% (dr: *E/Z* = 80:20).

(*E*)-Diastereoisomer. Yellow oil. IR (cm<sup>-1</sup>, neat): 777, 1041, 1156, 1420, 1445, 1620, 1698, 2963, 3377. <sup>1</sup>H-NMR (CDCl<sub>3</sub>, 400MHz) δ: 1.03 (t, 3H, *J* = 7.5 Hz), 1.32 (t, 3H, *J* = 7.3), 1.80 (s, 3H), 2.11-2.22 (m, 2H), 2.25 (s, 3H), 4.23 (q, 2H, *J* = 7.3), 5.75 (s, 1H), 6.83 (t, 1H, *J* = 7.3), 8.07 (br s, 1H). <sup>13</sup>C-NMR (CDCl<sub>3</sub>, 100MHz) δ: 12.5, 13.3, 13.6, 14.5, 23.8, 61.1, 108.2, 119.1, 120.8, 124.3, 128.0, 144.2, 168.3. Anal. Calcd. for C<sub>13</sub>H<sub>19</sub>NO<sub>2</sub> (221.30): C, 70.56; H, 8.65; N, 6.33. Found: C, 70.49; H, 8.60; N, 6.37.

(*Z*)-Diastereoisomer. Yellow oil. IR (cm<sup>-1</sup>, neat): 775, 1045, 1153, 1425, 1451, 1618, 1699, 2967, 3372. <sup>1</sup>H-NMR (CDCl<sub>3</sub>, 400MHz) δ: 1.09 (t, 3H, *J* = 7.5 Hz), 1.35 (t, 3H, *J* = 7.3), 2.07 (s, 3H), 2.22 (s, 3H), 2.38-2.47 (m, 2H), 4.29 (q, 2H, *J* = 7.3), 5.72 (s, 1H), 5.95 (t, 1H, *J* = 7.7), 8.40 (br s, 1H). <sup>13</sup>C-NMR (CDCl<sub>3</sub>, 100MHz) δ: 11.2, 13.2, 14.0, 14.4, 23.8, 61.1, 108.8, 117.5, 125.6, 128.1, 142.4, 168.0. GC-MS (70 eV): *m/z*: 221 ([M<sup>+</sup>], 56), 207 (8), 192 (54), 174 (17), 160 (36), 148 (41), 146 (54), 132 (100), 118 (48), 104 (11), 91 (18), 77 (18), 65 (12), 51 (8), 42 (15), 29 (20). Anal. Calcd. for C<sub>13</sub>H<sub>19</sub>NO<sub>2</sub> (221.30): C, 70.56; H, 8.65; N, 6.33. Found: C, 70.61; H, 8.70; N, 6.29.

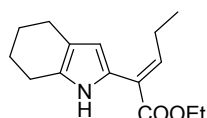

**Compound 4ad.** Yield 55% (isolated as single *E* diastereomer).

(*E*)-Diastereoisomer: Yellow oil. IR (cm<sup>-1</sup>, neat): 732, 771, 1115, 1445, 1621, 1701, 2945, 3333. <sup>1</sup>H-NMR (CDCl<sub>3</sub>, 400MHz) δ: 1.13 (t, 3H, *J* = 7.7 Hz), 1.34 (t, 3H, *J* = 7.3), 1.56-1.93 (m, 4H), 2.36-2.67 (m, 6H), 4.25 (q, 2H, *J* = 7.3 Hz), 6.02-6.08 (m, 1H), 6.67 (t, 1H, *J* = 7.3 Hz), 9.41 (br s, 1H). <sup>13</sup>C-NMR (CDCl<sub>3</sub>, 100MHz) δ: 14.0, 14.5, 23.0, 23.1, 23.6, 23.9, 24.0, 61.2, 110.1, 117.8, 123.2, 124.0, 127.7, 141.7, 168.6. GC-MS (70 eV): *m/z*: 247 ([M<sup>+</sup>], 65), 218 (46), 200 (100), 186 (27), 174 (38), 172 (71), 144 (50), 130 (55), 117 (35), 91 (20), 77 (21), 29 (28). Anal. Calcd. for C<sub>15</sub>H<sub>21</sub>NO<sub>2</sub> (247.34): C, 72.84; H, 8.56; N, 5.66. Found: C, 72.91; H, 8.60; N, 8.49.

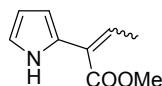

**Compound 4ba.** Yield 62% (dr: *E/Z* = 70:30).

(*E*)-Diastereoisomer. Yellow oil. IR (cm<sup>-1</sup>, neat): 722, 770, 802, 1114, 1212, 1435, 1615, 1699, 2950, 3417. <sup>1</sup>H-NMR (CDCl<sub>3</sub>, 400MHz) δ: 2.08 (d, 3H, *J* = 7.3 Hz), 3.81 (s, 3H), 6.26-6.30 (m, 1H), 6.33-6.37 (m, 1H), 6.83-6.87 (m, 1H), 7.00 (q, 1H, *J* = 7.3 Hz), 9.87 (br s, 1H). <sup>13</sup>C-NMR (CDCl<sub>3</sub>, 100MHz) δ: 16.3, 52.1, 108.9, 111.0, 117.9, 124.8, 125.7, 136.2, 168.6. GC-MS (70 eV): *m/z*: 165 ([M<sup>+</sup>], 69), 133 (28), 106 (46), 105 (100), 104 (72), 91 (11), 79 (39), 77 (34), 51 (16), 39 (8). Anal. Calcd. for C<sub>9</sub>H<sub>11</sub>NO<sub>2</sub> (165.19): C, 65.44; H, 6.71; N, 8.48. Found: C, 65.38; H, 6.67; N, 8.53.

(*Z*)-Diastereoisomer. Yellow oil. IR (cm<sup>-1</sup>, neat): 723, 769, 802, 1112, 1217, 1437, 1609, 1701, 2954, 3411. <sup>1</sup>H-NMR (CDCl<sub>3</sub>, 400MHz) δ: 2.07 (d, 3H, *J* = 7.3 Hz), 3.87 (s, 3H), 6.16-6.20 (m, 1H), 6.26-6.32 (m, 1H), 6.50 (q, 1H, *J* = 7.3 Hz), 6.74-6.79 (m, 1H), 9.24 (br s, 1H). <sup>13</sup>C-NMR (CDCl<sub>3</sub>, 100MHz) δ: 16.2, 52.0, 106.1, 109.3, 118.1, 125.7, 133.6, 137.0, 168.3. GC-MS (70 eV): *m/z*: 165 ([M<sup>+</sup>], 84), 133 (38), 106 (53), 105 (100), 104 (75), 91 (10), 79 (34), 77 (34), 51 (14), 40 (9), 32 (51). Anal. Calcd. for C<sub>9</sub>H<sub>11</sub>NO<sub>2</sub> (165.19): C, 65.44; H, 6.71; N, 8.48. Found: C, 65.49; H, 6.75; N, 8.44.

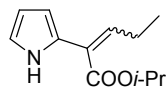

**Compound 4ca.** Yield 53% (dr: *E/Z* = 70:30).

(*E*)-Diastereoisomer. Yellow oil. IR (cm<sup>-1</sup>, neat): 721, 767, 802, 1090, 1105, 1212, 1271, 1464, 1612, 1693, 2977, 3418. <sup>1</sup>H-NMR (CDCl<sub>3</sub>, 400MHz) δ: 1.15 (t, 3H, *J* = 7.5 Hz), 1.33 (d, 6H, *J* = 6.4 Hz), 2.45-2.55 (m, 2H), 5.08-5.19 (m, 1H), 6.24-6.27 (m, 1H), 6.29-6.33 (m, 1H), 6.75 (t, 1H, *J* = 6.8 Hz), 6.81-6.87 (m, 1H), 9.94 (br s, 1H). <sup>13</sup>C-NMR (CDCl<sub>3</sub>, 100MHz) δ: 13.9, 22.1, 23.8, 68.8, 108.7, 110.7, 117.9, 123.5, 126.1, 142.9, 168.0. GC-MS (70 eV): *m/z*: 207 ([M<sup>+</sup>], 38), 164 (28), 146 (44), 132 (22), 120 (42), 119 (45), 118 (100), 104 (26), 91 (24), 77 (13), 65 (9), 43 (12). Anal. Calcd. for C<sub>12</sub>H<sub>17</sub>NO<sub>2</sub> (207.27): C, 69.54; H, 8.27; N, 6.76. Found: C, 69.60; H, 8.33; N, 6.72.

(*Z*)-Diastereoisomer. Yellow oil. IR (cm<sup>-1</sup>, neat): 720, 769, 802, 1097, 1110, 1213, 1269, 1458, 1614, 1698, 2977, 3416. <sup>1</sup>H-NMR (CDCl<sub>3</sub>, 400MHz) δ: 1.10 (t, 3H, *J* = 7.5 Hz), 1.35 (d, 6H, *J* = 6.4 Hz), 2.41-2.53 (m, 2H), 5.16-5.26 (m, 1H), 6.15-6.21 (m, 1H), 6.27-6.34 (m, 2H), 6.73-6.78 (m, 1H), 9.28 (br s, 1H). <sup>13</sup>C-NMR (CDCl<sub>3</sub>, 100MHz) δ: 14.2, 22.2, 23.5, 69.0, 105.8, 109.3, 118.0, 124.8, 136.6, 138.8, 167.6. GC-MS (70 eV): *m/z*: 207 ([M<sup>+</sup>], 57), 164 (34), 146 (51), 132 (23), 120 (46), 119 (44), 118 (100), 104 (26), 91 (23), 77 (11), 65 (8), 43 (8). Anal. Calcd. for C<sub>12</sub>H<sub>17</sub>NO<sub>2</sub> (207.27): C, 69.54; H, 8.27; N, 6.76. Found: C, 69.60; H, 8.30; N, 6.72.

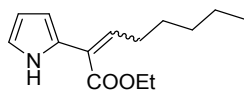

**Compound 4da.** Yield 54% (dr: *E/Z* = 80:20; inseparable diastereomeric mixture).

Yellow oil. IR (cm<sup>-1</sup>, neat): 724, 772, 803, 1104, 1221, 1457, 1615, 1697, 2961, 3402. <sup>1</sup>H-NMR (CDCl<sub>3</sub>, 400MHz) δ: 0.83-0.95 (m, 3H), 1.22-1.41 (m, 7H), 1.43-1.63 (m, 2H), 2.38-2.53 (m, 2H), 4.23-4.37 (m, 2H), 6.14-6.21 (m, 0.2H), 6.24-6.39 (m, 2H), 6.74-6.79 (m, 0.2H), 6.80-6.87 (m, 1.6H), 9.25 (br s, 0.2H), 9.89 (br s, 0.8). <sup>13</sup>C-NMR (CDCl<sub>3</sub>, 100MHz) δ: 14.2, 14.4, 14.5, 22.7, 29.2, 29.4, 30.2, 30.5, 31.8, 31.9, 61.1, 61.3, 105.9, 108.8, 109.3, 110.8, 118.0, 118.1, 123.5, 124.8, 126.0, 129.3, 138.3, 142.1, 168.3, 168.4. GC-MS (70 eV): *m/z*: (*E*)-Diastereoisomer: 235 ([M<sup>+</sup>], 77), 210 (24), 188 (39), 165 (28), 162 (42), 146 (28), 132 (100), 118 (46), 106 (23), 104 (47), 92 (20), 79 (17), 77 (17), 41 (6), 29 (7). (*Z*)-Diastereoisomer: 235 ([M<sup>+</sup>], 69), 210 (21), 188 (36), 165 (27), 162 (40), 146 (27), 132 (100), 118 (44), 106 (23), 104 (48), 92 (21), 79 (17), 77 (18), 41 (7), 29 (8). Anal. Calcd. for C<sub>14</sub>H<sub>21</sub>NO<sub>2</sub> (235.33): C, 71.46; H, 9.00; N, 5.95. Found: C, 71.52; H, 9.07; N, 5.92.

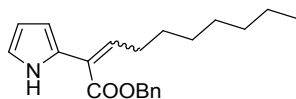

**Compound 4ea.** Yield 56% (dr: *E/Z* = 70:30).

(*E*)-Diastereoisomer. Yellow oil. IR (cm<sup>-1</sup>, neat): 697, 723, 1095, 1205, 1455, 1609, 1699, 2924, 3029, 3423. <sup>1</sup>H-NMR (CDCl<sub>3</sub>, 400MHz) δ: 0.89 (t, 3H, *J* = 6.8 Hz), 1.18-1.41 (m, 8H), 1.48-1.59 (m, 2H), 2.42-2.53 (m, 2H), 5.27 (s, 2H), 6.24-6.29 (m, 1H), 6.30-6.35 (m, 1H), 6.82-6.85 (m, 1H), 6.90 (t, 1H, *J* = 7.3 Hz), 7.17-7.48 (m, 5H), 9.86 (br s, 1H). <sup>13</sup>C-NMR (CDCl<sub>3</sub>, 100MHz) δ: 14.3, 22.9, 29.4, 29.5, 29.7, 30.6, 32.0, 67.0, 108.8, 110.9, 118.0, 123.3, 128.3, 128.5, 128.8, 128.9, 136.2, 142.8, 168.1. GC-MS (70 eV): *m/z*: 325([M<sup>+</sup>], 6), 234 (32), 216 (28), 132 (9), 118 (9), 106 (14), 91 (100), 80 (10), 65 (9), 41 (5). Anal. Calcd. for C<sub>21</sub>H<sub>27</sub>NO<sub>2</sub> (325.45): C, 77.50; H, 8.36; N, 4.30. Found: C, 77.43; H, 8.31; N, 4.32.

(*Z*)-Diastereoisomer. Yellow oil. IR (cm<sup>-1</sup>, neat): 698, 721, 1099, 1212, 1453, 1610, 1698, 2928, 3027, 3421. <sup>1</sup>H-NMR (CDCl<sub>3</sub>, 400MHz) δ: 0.84 (t, 3H, *J* = 7.3 Hz), 0.97-1.54 (m, 10H), 2.36-2.52 (m, 2H), 5.30 (s, 2H), 6.14-6.19 (m, 1H), 6.27-6.30 (m, 1H), 6.38 (t, 1H, *J* = 7.7 Hz), 6.72-6.76 (m, 1H), 7.23-7.47 (m, 5H), 9.22 (br s, 1H). <sup>13</sup>C-NMR (CDCl<sub>3</sub>, 100MHz) δ: 14.3, 22.8, 29.3, 29.6, 29.7, 30.3, 32.0, 67.0, 106.0, 109.9, 118.1, 124.8, 128.3, 128.7, 128.8, 128.9, 139.1, 142.8, 164.5. GC-MS (70 eV): *m/z*: 325([M<sup>+</sup>], 6), 234 (34), 216 (29), 132 (9), 118 (9), 106 (12), 91 (100), 80 (10), 65 (9), 41 (6). Anal. Calcd. for C<sub>21</sub>H<sub>27</sub>NO<sub>2</sub> (325.45): C, 77.50; H, 8.36; N, 4.30. Found: C, 77.56; H, 8.39; N, 4.28.

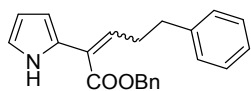

**Compound 4fa.** Yield 68% (dr: *E/Z* = 80:20).

(*E*)-Diastereoisomer. Yellow oil. IR (cm<sup>-1</sup>, neat): 698, 728, 1029, 1101, 1208, 1454, 1603, 1698, 2926, 3028, 3422. <sup>1</sup>H-NMR (CDCl<sub>3</sub>, 400MHz) δ: 2.82-2.93 (m, 4H), 5.30 (s, 2H), 6.28-6.33 (m, 1H), 6.35-6.40 (m, 1H), 6.84-6.88 (m, 1H), 6.99 (t, 1H, *J* = 6.7 Hz), 7.23-7.31 (m, 3H), 7.32-7.38 (m, 2H), 7.39-7.48 (m, 5H), 9.84 (br s, 1H). <sup>13</sup>C-NMR (CDCl<sub>3</sub>, 100MHz) δ: 32.3, 35.5, 67.1, 109.0, 111.2, 118.3, 123.9, 125.6, 126.5, 128.3, 128.6, 128.7, 128.8, 128.9, 136.2, 141.0, 141.4, 168.0. GC-MS (70 eV): *m/z*: 331 ([M<sup>+</sup>], 3), 240 (30), 91 (100), 65 (9). Anal. Calcd. for C<sub>22</sub>H<sub>21</sub>NO<sub>2</sub> (331.41): C, 79.73; H, 6.39; N, 4.23. Found: C, 79.77; H, 6.43; N, 4.19.

(*Z*)-Diastereoisomer. Yellow oil. IR (cm<sup>-1</sup>, neat): 697, 731, 1035, 1104, 1209, 1454, 1607, 1699, 2929, 3026, 3420. <sup>1</sup>H-NMR (CDCl<sub>3</sub>, 400MHz) δ: 2.68-2.81 (m, 4H), 5.28 (s, 2H), 6.14-6.19 (m, 1H), 6.25-6.30 (m, 1H), 6.40 (t, 1H, *J* = 6.8 Hz), 6.71-6.76 (m, 1H), 7.03-7.11 (m, 2H), 7.14-7.44 (m, 8H), 9.22 (br s, 1H). <sup>13</sup>C-NMR (CDCl<sub>3</sub>, 100MHz) δ: 31.8, 35.7, 67.1, 106.4, 109.3, 118.3, 126.2, 126.3, 128.4, 128.6, 128.7, 128.9, 129.1, 135.7, 137.1, 140.1, 141.3, 167.5. GC-MS (70 eV): *m/z*: 331 ([M<sup>+</sup>], 4), 240 (28), 91 (100), 65 (12).

Anal. Calcd. for C<sub>22</sub>H<sub>21</sub>NO<sub>2</sub> (331.41): C, 79.73; H, 6.39; N, 4.23. Found: C, 79.79; H, 6.43; N, 4.20.

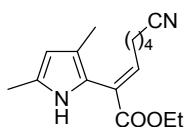

**Compound 4gc** Yield 75% (isolated as single *E* diastereomer).

(*E*)-Diastereoisomer. Yellow oil. IR (cm<sup>-1</sup>, neat): 778, 1043, 1248, 1627, 1705, 2245, 2932, 3374. <sup>1</sup>H-NMR (CDCl<sub>3</sub>, 400MHz) δ: 1.31 (t, 3H, *J* = 7.3 Hz), 1.53-1.67 (m, 4H), 1.88 (s, 3H), 2.14-2.28 (m, 4H), 2.24 (s, 3H), 4.22 (q, 2H, *J* = 7.3 Hz), 5.71-5.77 (m, 1H), 6.80 (t, 1H, *J* = 7.7 Hz), 8.13 (br s, 1H). <sup>13</sup>C-NMR (CDCl<sub>3</sub>, 100MHz) δ: 12.6, 13.3, 14.5, 17.0, 25.0, 27.9, 29.2, 61.3, 108.3, 119.2, 119.8, 120.2, 126.0, 128.4, 142.7, 168.0. GC-MS (70 eV): *m/z*: 274 ([M<sup>+</sup>], 90), 245 (50), 206 (45), 201 (87), 160 (100), 132 (67), 118 (36), 91 (13). Anal. Calcd. for C<sub>16</sub>H<sub>22</sub>N<sub>2</sub>O<sub>2</sub> (274.36): C, 70.04; H, 8.08; N, 10.21. Found: C, 70.11; H, 8.11; N, 10.17.



181 ( $[M^+]$ , 46), 152 (47), 136 (100), 134 (90), 121 (36), 83 (16), 43 (54). Anal. Calcd. for  $C_{10}H_{15}NO_2$  (181.23): C, 66.27; H, 8.34; N, 7.73. Found: C, 66.32; H, 8.30; N, 7.76.

### Spectroscopic data of compounds 6

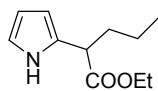

#### Compound 6aa. Yield 62%.

Colourless oil. IR ( $cm^{-1}$ , neat): 722, 1161, 1442, 1718, 2961, 3393.  $^1H$ -NMR ( $CDCl_3$ , 400MHz)  $\delta$ : 0.92 (t, 3H,  $J = 7.7$  Hz), 1.23-1.38 (m, 2H), 1.27 (t, 3H,  $J = 7.3$  Hz), 1.69-1.82 (m, 1H), 1.88-2.00 (m, 1H), 3.67 (t, 1H,  $J = 7.7$  Hz), 4.09-4.24 (m, 2H), 5.99-6.05 (m, 1H), 6.10-6.15 (m, 1H), 6.71-6.75 (m, 1H), 8.66 (br s, 1H).  $^{13}C$ -NMR ( $CDCl_3$ , 100MHz)  $\delta$ : 13.9, 14.4, 20.8, 36.2, 44.7, 61.1, 106.7, 108.2, 117.7, 128.7, 174.5. GC-MS (70 eV):  $m/z$ : 195 ( $[M^+]$ , 42), 152 (23), 122 (100), 106 (38), 93 (24), 80 (99), 29 (10). Anal. Calcd. for  $C_{11}H_{17}NO_2$  (195.26): C, 67.66; H, 8.78; N, 7.17. Found: C, 67.73; H, 8.81; N, 7.13.

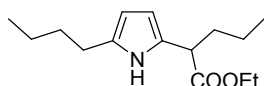

#### Compound 6ab. Yield 53%.

Colourless oil. IR ( $cm^{-1}$ , neat): 724, 1159, 1447, 1721, 2959, 3389.  $^1H$ -NMR ( $CDCl_3$ , 400MHz)  $\delta$ : 0.89-0.95 (m, 6H), 1.27 (t, 3H,  $J = 7.3$  Hz), 1.28-1.42 (m, 4H), 1.54-1.64 (m, 2H), 1.67-1.78 (m, 1H), 1.86-1.98 (m, 1H), 2.53-2.58 (m, 2H), 3.60 (t, 1H,  $J = 7.7$  Hz), 4.06-4.24 (m, 2H), 5.76-5.80 (m, 1H), 5.87-5.90 (m, 1H), 8.27 (br s, 1H).  $^{13}C$ -NMR ( $CDCl_3$ , 100MHz)  $\delta$ : 14.0, 14.1, 14.4, 20.9, 22.7, 27.8, 31.9, 36.2, 44.8, 61.1, 104.6, 106.5, 126.9, 133.0, 174.7. GC-MS (70 eV):  $m/z$ : 251 ( $[M^+]$ , 21), 208 (40), 178 (100), 136 (18), 106 (25). Anal. Calcd. for  $C_{15}H_{25}NO_2$  (251.19): C, 71.67; H, 10.03; N, 5.57. Found: C, 71.71; H, 10.09; N, 5.54.

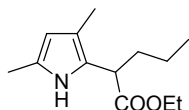

#### Compound 6ac. Yield 51%.

Colourless oil. IR ( $cm^{-1}$ , neat): 639, 780, 1029, 1177, 1464, 1603, 1715, 2960, 3391.  $^1H$ -NMR ( $CDCl_3$ , 400MHz)  $\delta$ : 0.92 (t, 3H,  $J = 7.7$  Hz), 1.23-1.36 (m, 5H), 1.59-1.75 (m, 1H), 1.82-1.94 (m, 1H), 2.01 (s, 3H), 2.22 (s, 3H), 3.66 (t, 1H,  $J = 7.7$  Hz), 4.04-4.25 (m, 2H), 5.46-5.78 (m, 1H), 8.20 (br s, 1H).  $^{13}C$ -NMR ( $CDCl_3$ , 100MHz)  $\delta$ : 11.0, 13.3, 14.0, 14.4, 20.8, 36.8, 42.4, 61.0, 107.8, 125.5, 128.5, 129.3, 175.0. GC-MS (70 eV):  $m/z$ : 223 ( $[M^+]$ , 34), 180 (35), 150 (100), 134 (32), 108 (28). Anal. Calcd. for  $C_{13}H_{21}NO_2$  (223.32): C, 69.92; H, 9.48; N, 6.27. Found: C, 69.99; H, 9.52; N, 6.24.

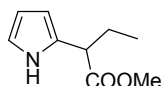

#### Compound 6ba. Yield 52%.

Colourless oil. IR ( $cm^{-1}$ , neat): 720, 1163, 1435, 1720, 2964, 3385.  $^1H$ -NMR ( $CDCl_3$ , 400MHz)  $\delta$ : 0.91 (t, 3H,  $J = 7.7$  Hz), 1.72-1.88 (m, 1H), 1.93-2.07 (m, 1H), 3.59 (t, 1H,  $J = 7.7$  Hz), 3.71 (s, 3H), 6.00-6.06 (m, 1H), 6.10-6.16 (m, 1H), 6.72-6.77 (m, 1H), 8.63 (br s, 1H).  $^{13}C$ -NMR ( $CDCl_3$ , 100MHz)  $\delta$ : 12.2, 27.2, 46.5, 52.3, 106.9, 108.3, 117.8, 128.4, 174.8. GC-MS (70 eV):  $m/z$ : 167 ( $[M^+]$ , 29), 138 (16), 108 (100), 106 (33), 93 (18), 80 (26). Anal. Calcd. for  $C_9H_{13}NO_2$  (167.21): C, 64.65; H, 7.84; N, 8.38. Found: C, 64.71; H, 7.90; N, 8.33.

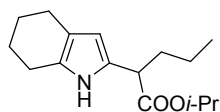

#### Compound 6cd. Yield 64%.

Colourless oil. IR ( $cm^{-1}$ , neat): 730, 784, 1105, 1175, 1455, 1602, 1713, 2927, 3386.  $^1H$ -NMR ( $CDCl_3$ , 400MHz)  $\delta$ : 0.92 (t, 3H,  $J = 7.7$  Hz), 1.23 (d, 3H,  $J = 6.4$  Hz), 1.26 (d, 3H,  $J = 6.0$  Hz), 1.28-1.39 (m, 2H), 1.63-1.83 (m, 5H), 1.85-1.97 (m, 1H), 2.42-2.49 (m, 2H), 2.50-2.57 (m, 2H), 3.54 (t, 1H,  $J = 7.7$  Hz), 4.95-5.07 (m, 1H), 5.73 (s, 1H), 8.11 (br s, 1H).  $^{13}C$ -NMR ( $CDCl_3$ , 100MHz)  $\delta$ : 14.0, 20.9, 22.0, 22.1, 23.0, 23.1, 23.6, 24.0, 36.8, 45.0, 68.5, 105.7, 116.7, 125.5, 126.8, 174.2. GC-MS (70 eV):  $m/z$ : 263 ( $[M^+]$ , 32), 220 (14), 176 (100), 160 (16), 134 (22), 119 (22). Anal. Calcd. for  $C_{16}H_{25}NO_2$  (263.38): C, 72.97; H, 9.57; N, 5.32. Found: C, 73.02; H, 9.61; N, 5.29.

<sup>1</sup>H-NMR Spectra of compounds **5ea**

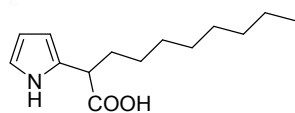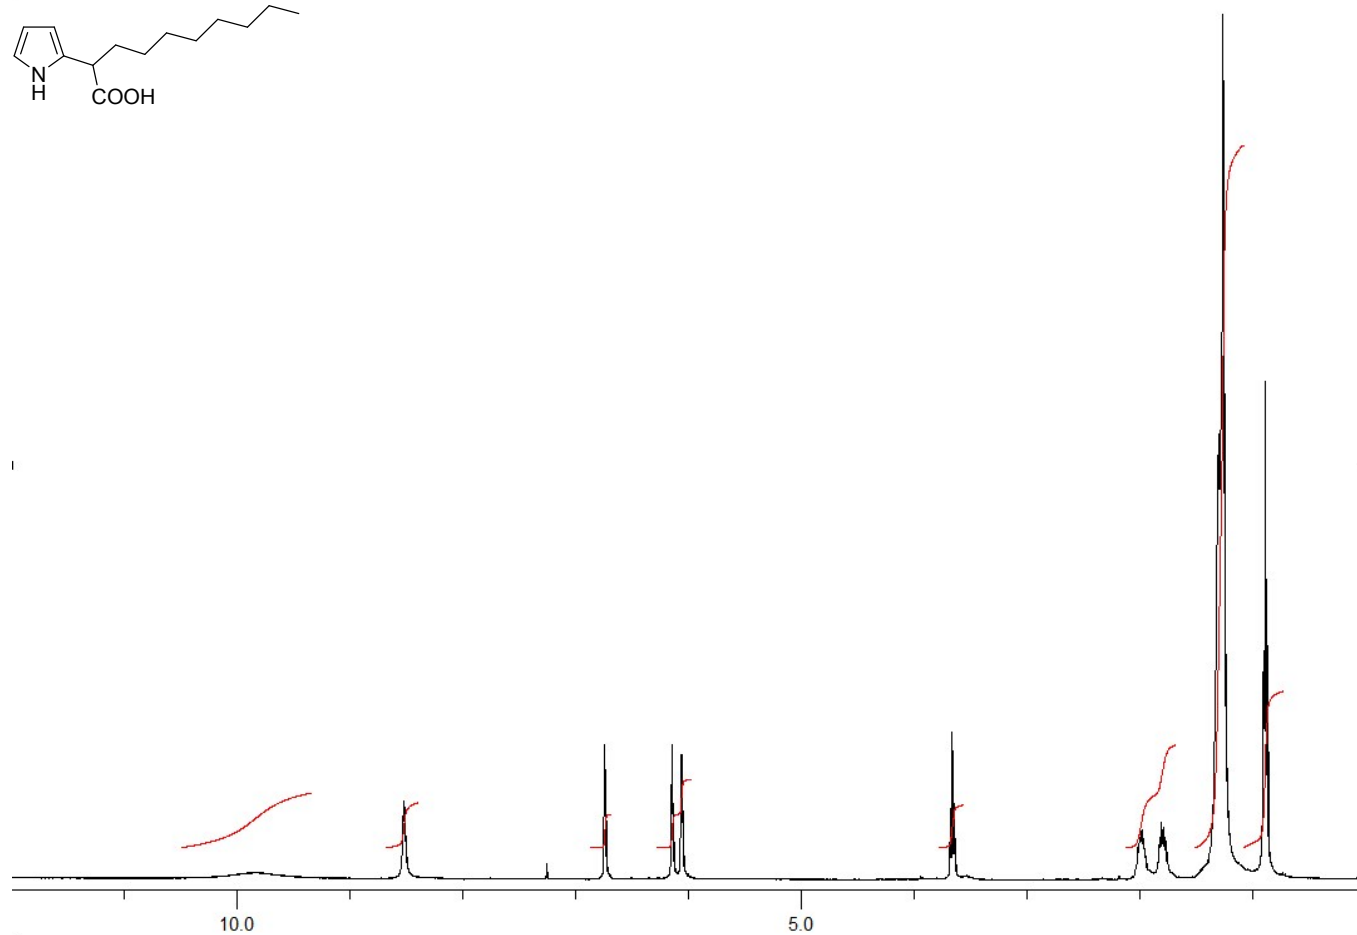

<sup>13</sup>C-NMR Spectra of compounds **5ea**

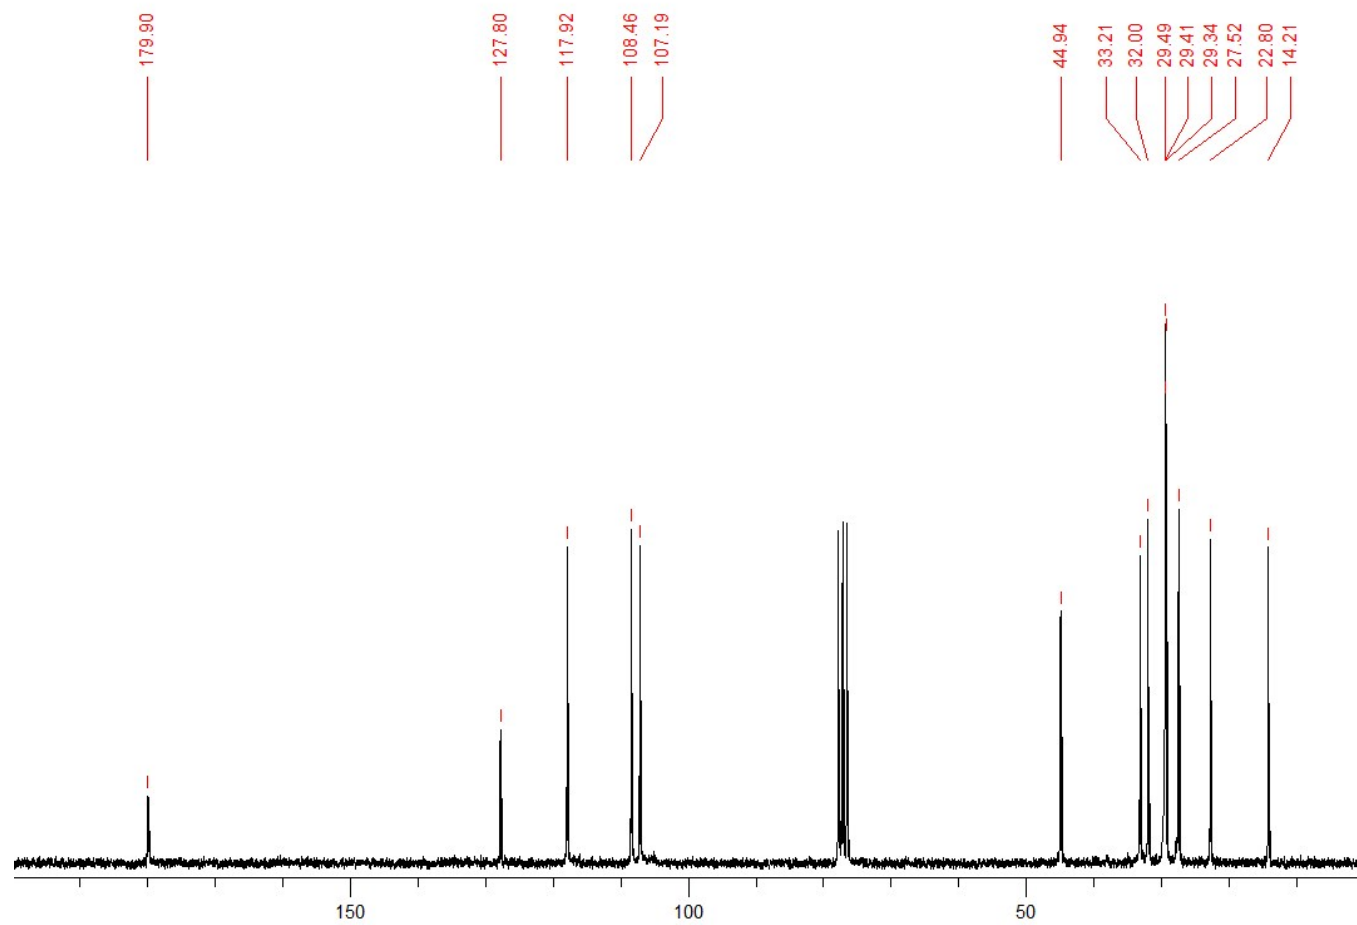

<sup>1</sup>H-NMR Spectra of compounds **5fa**

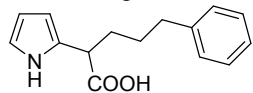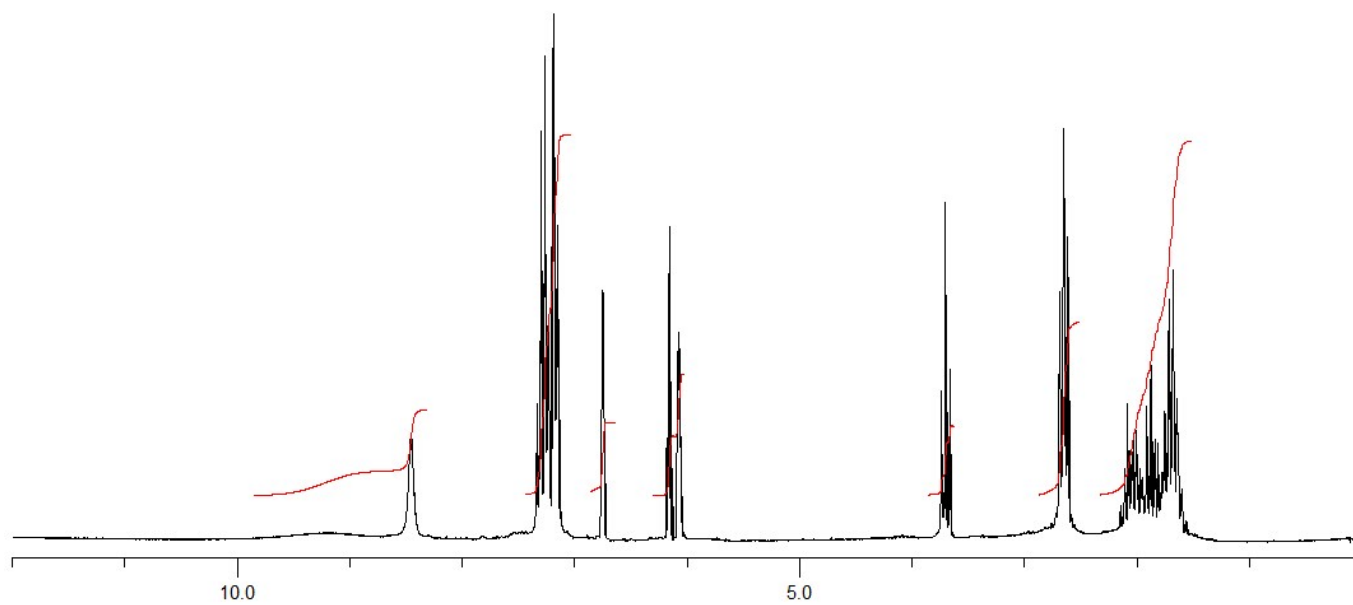

<sup>13</sup>C-NMR Spectra of compounds **5fa**

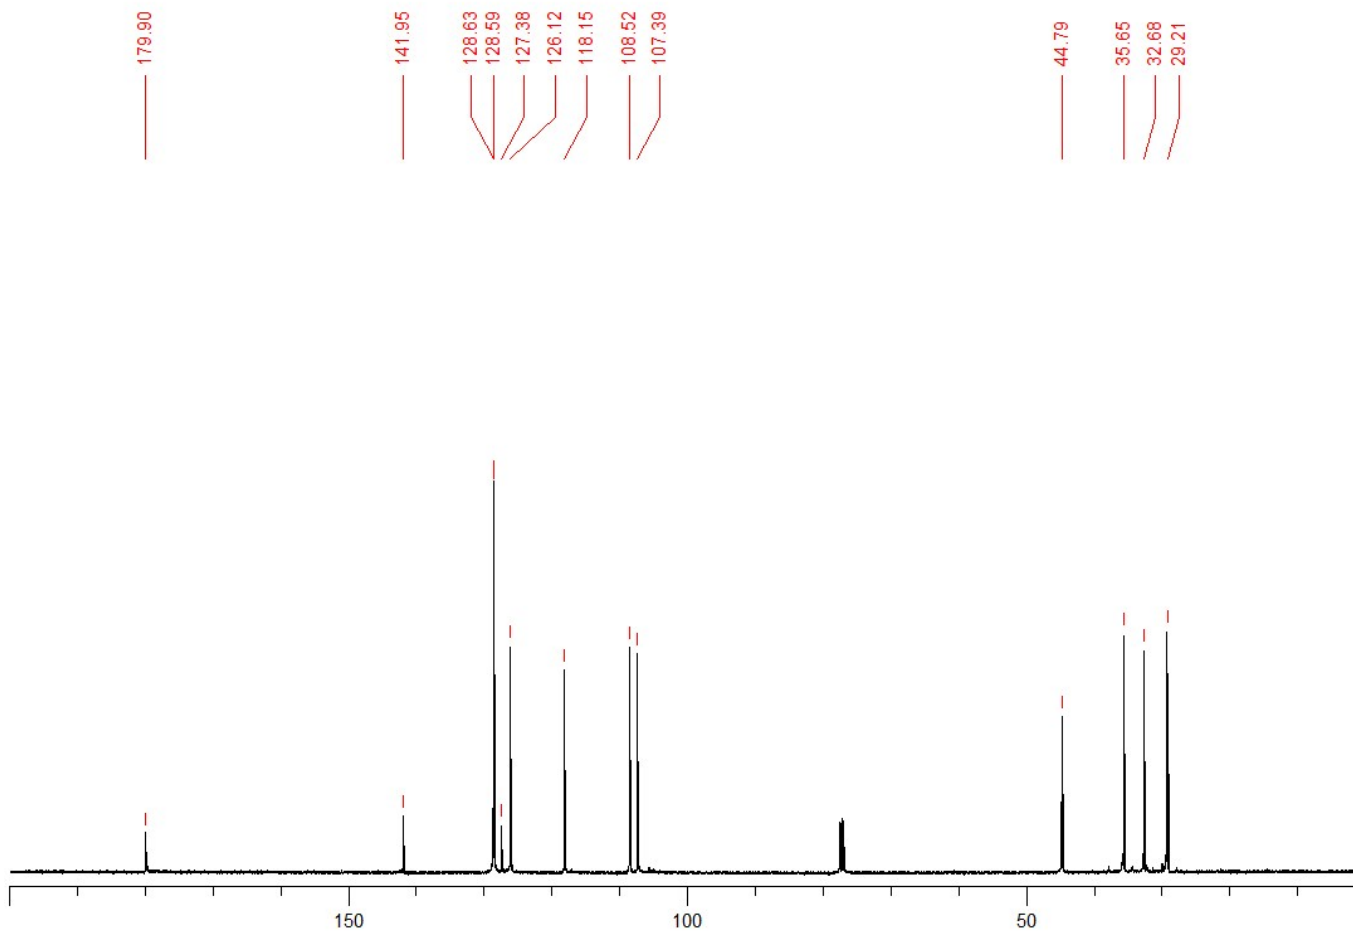

<sup>1</sup>H-NMR Spectra of compounds **5ia**

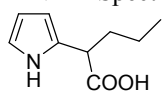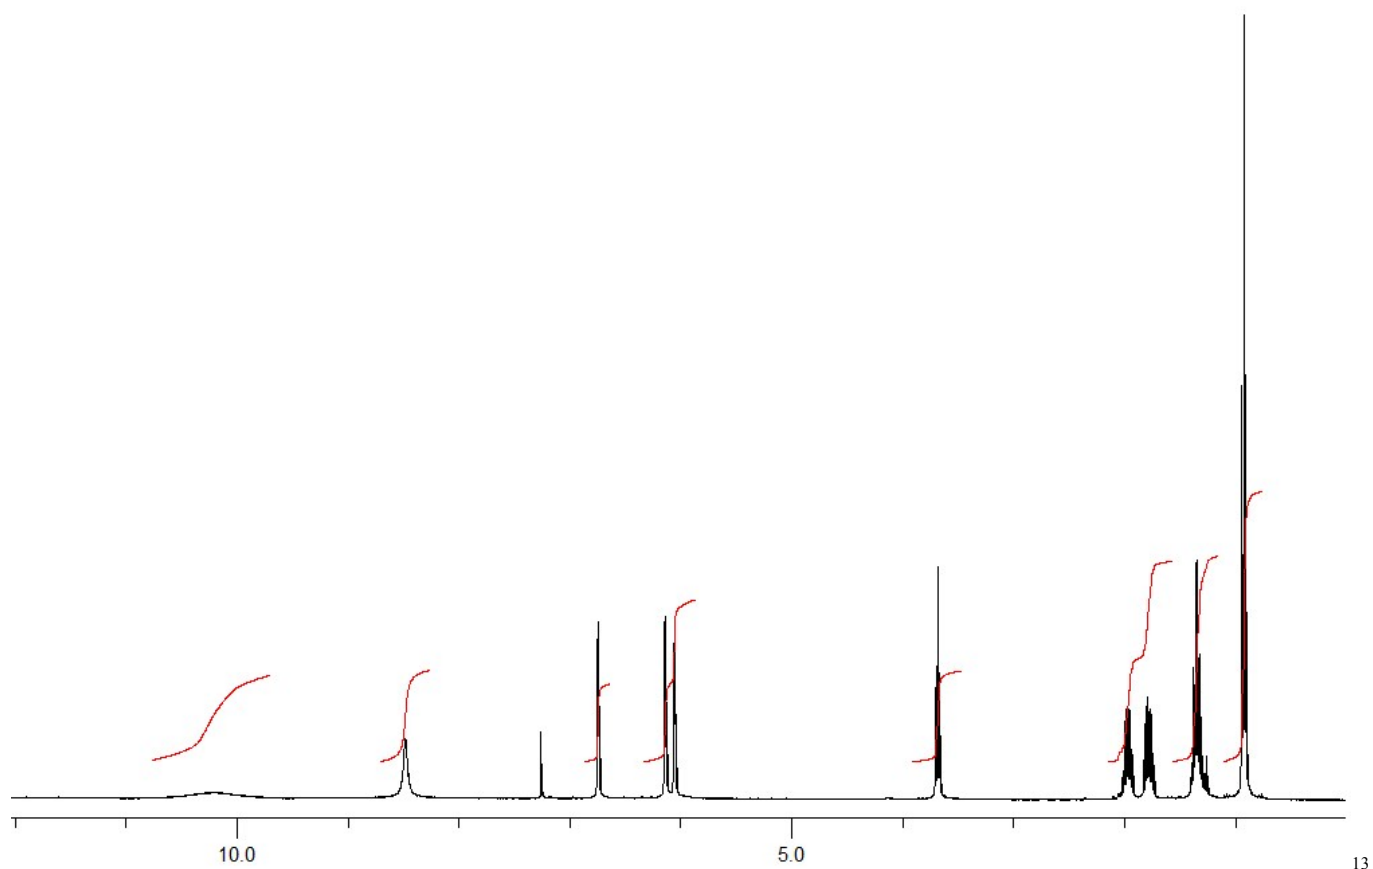

13

C-NMR Spectra of compounds **5ia**

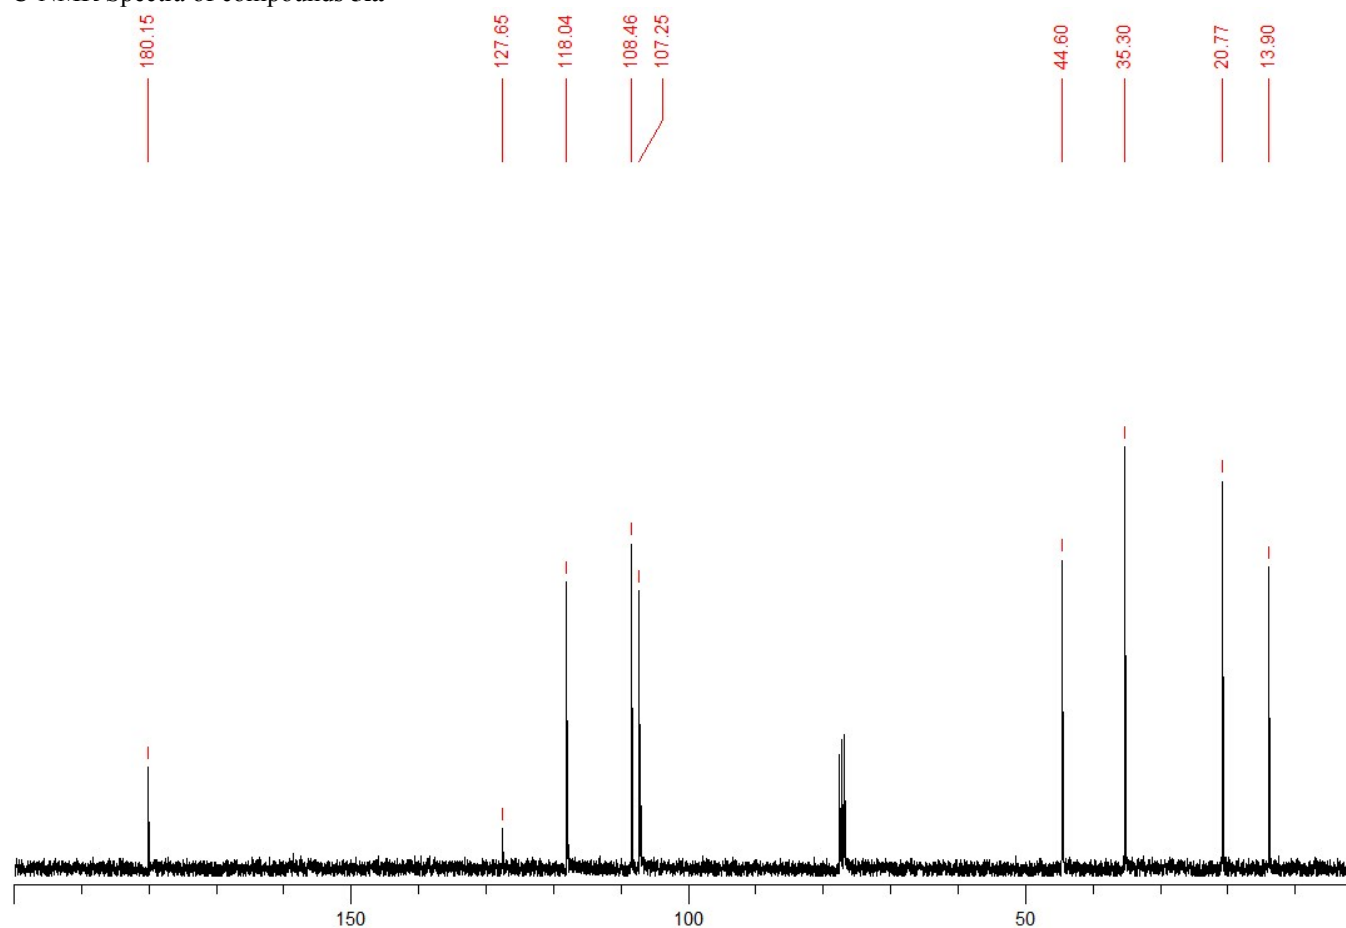



<sup>1</sup>H-NMR Spectra of compounds **5ja**

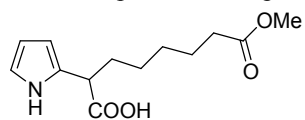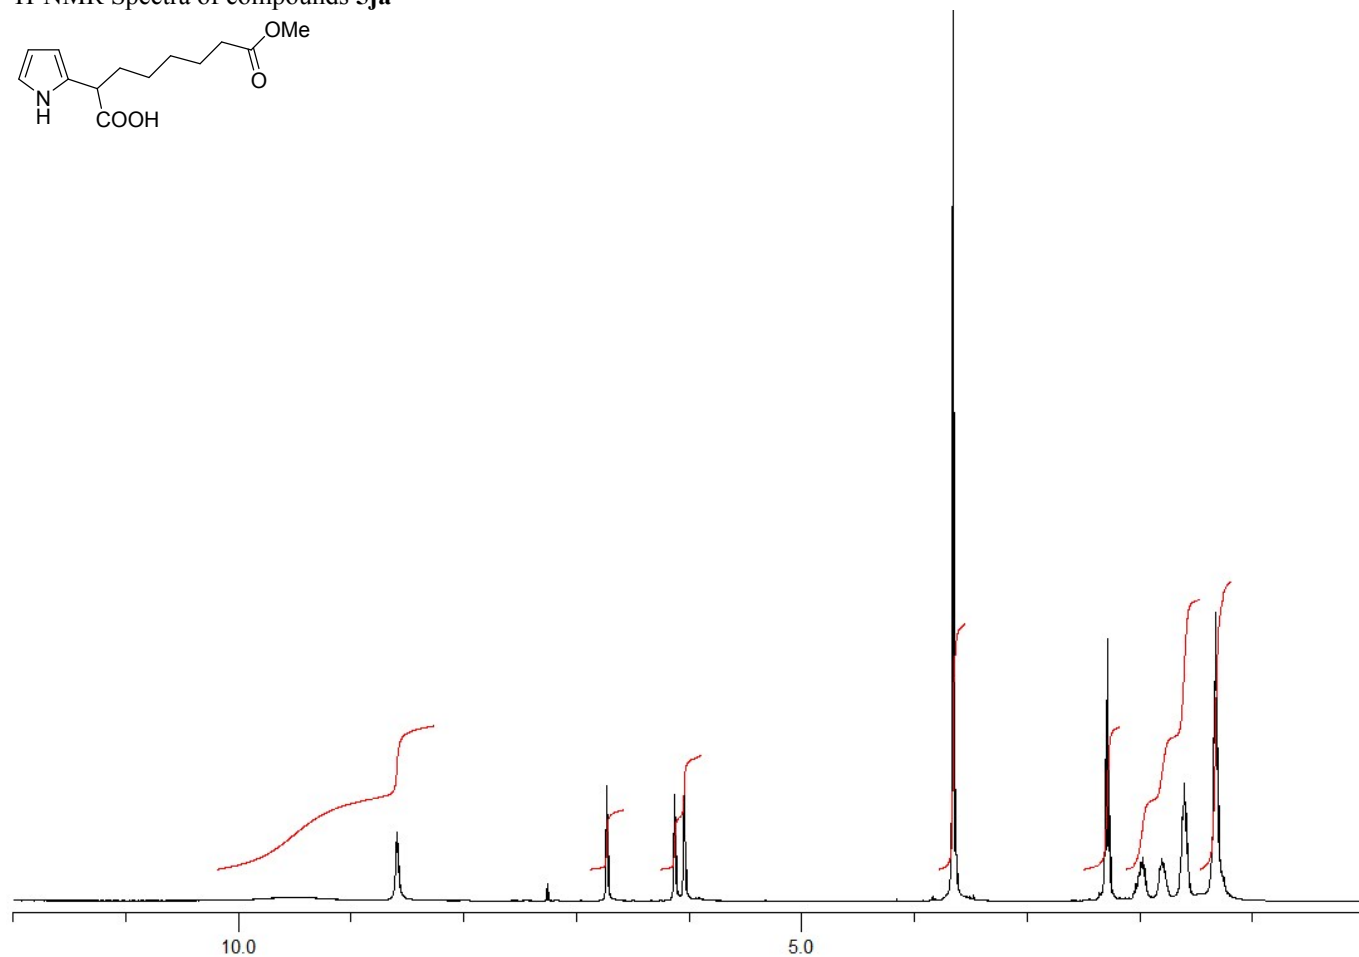

<sup>13</sup>C-NMR Spectra of compounds **5ja**

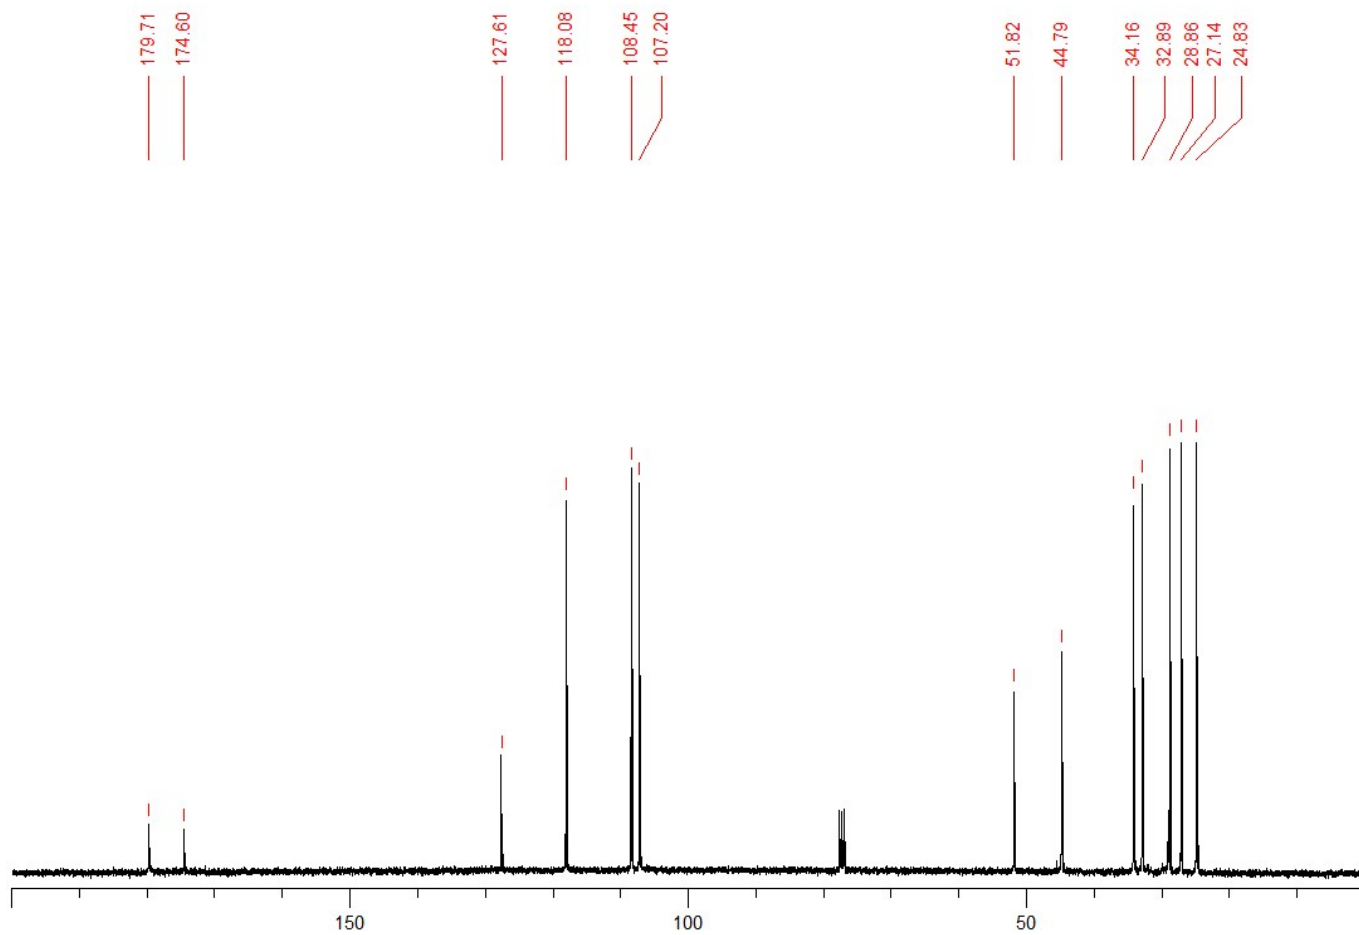

<sup>1</sup>H-NMR Spectra of compounds **5kc**

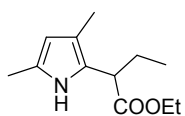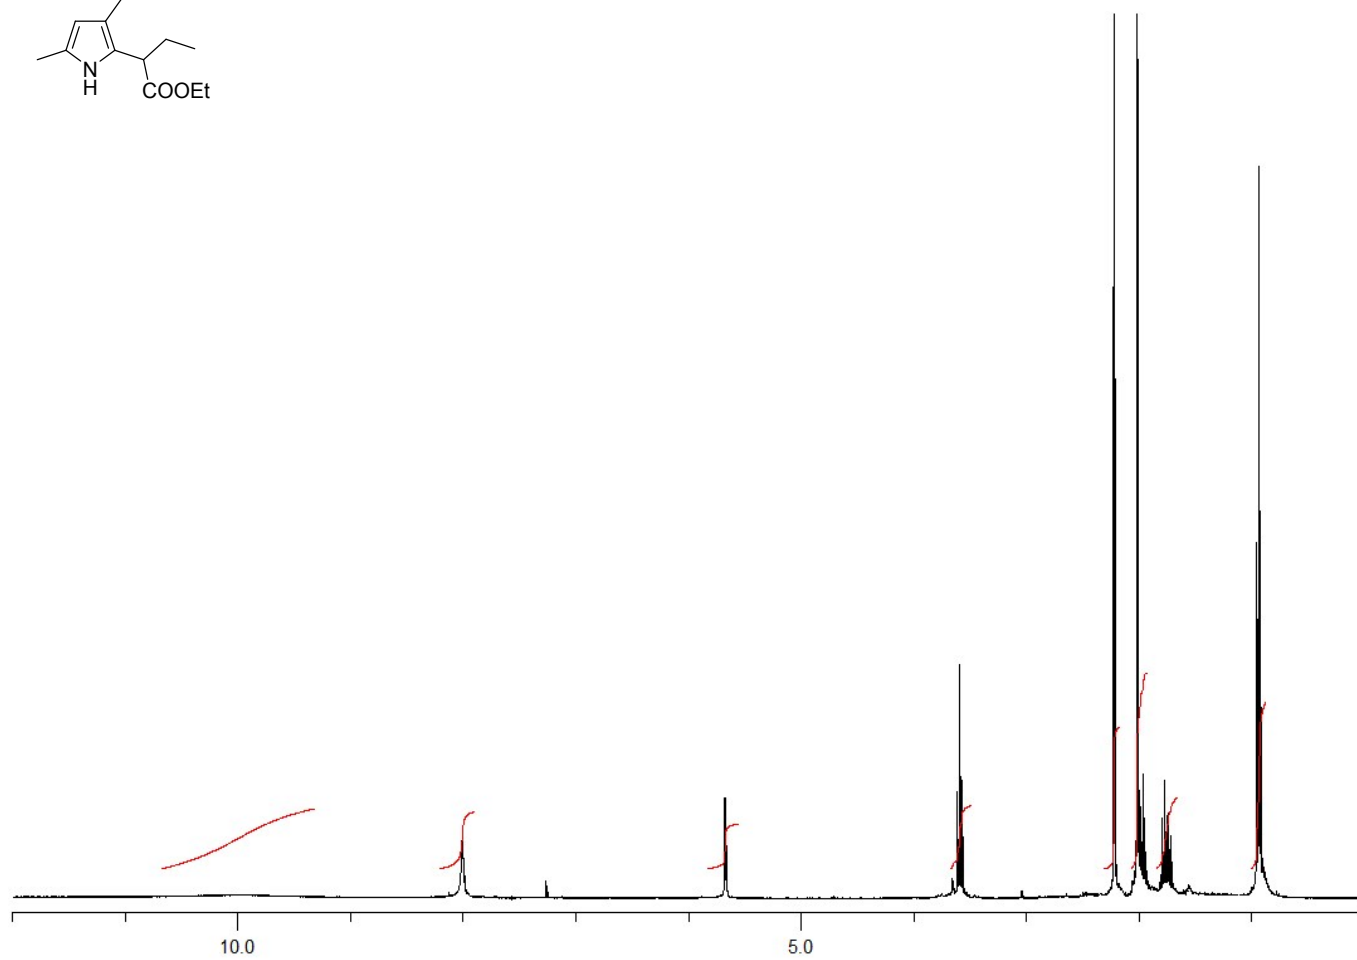

<sup>13</sup>C-NMR Spectra of compounds **5kc**

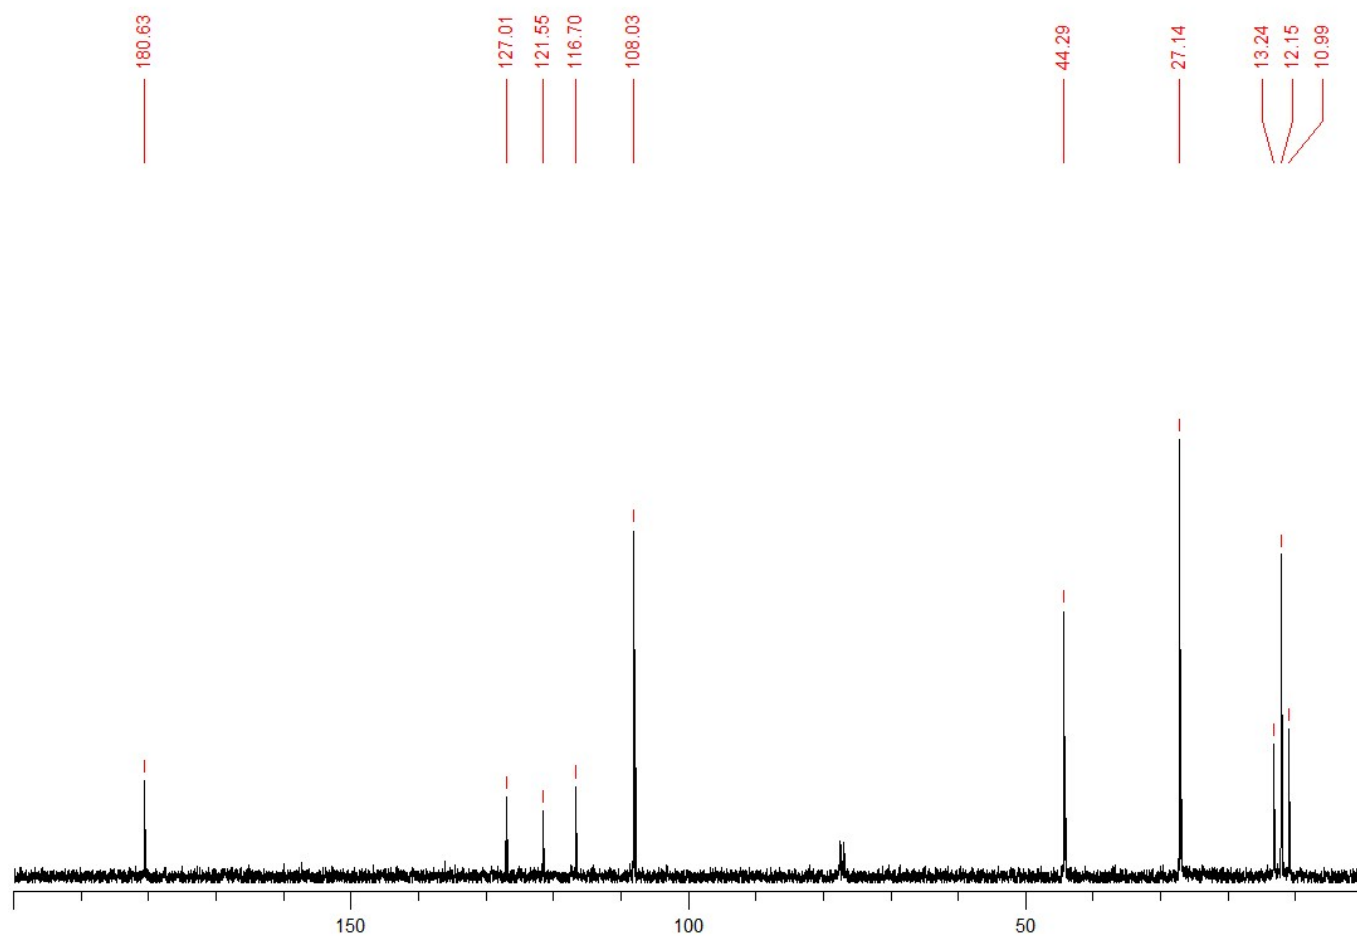

<sup>1</sup>H-NMR Spectra of compounds **6aa**

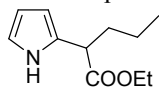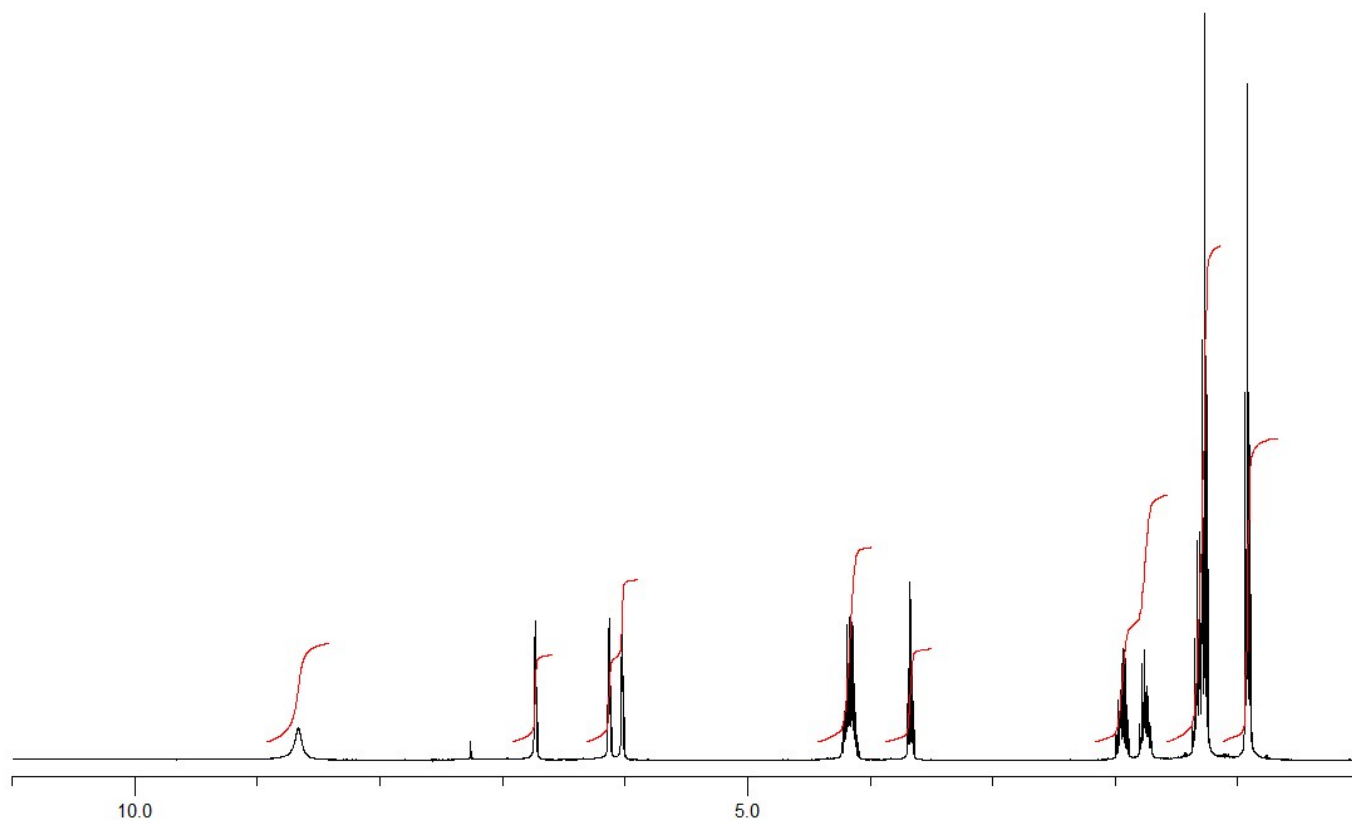

<sup>13</sup>C-NMR Spectra of compounds **6aa**

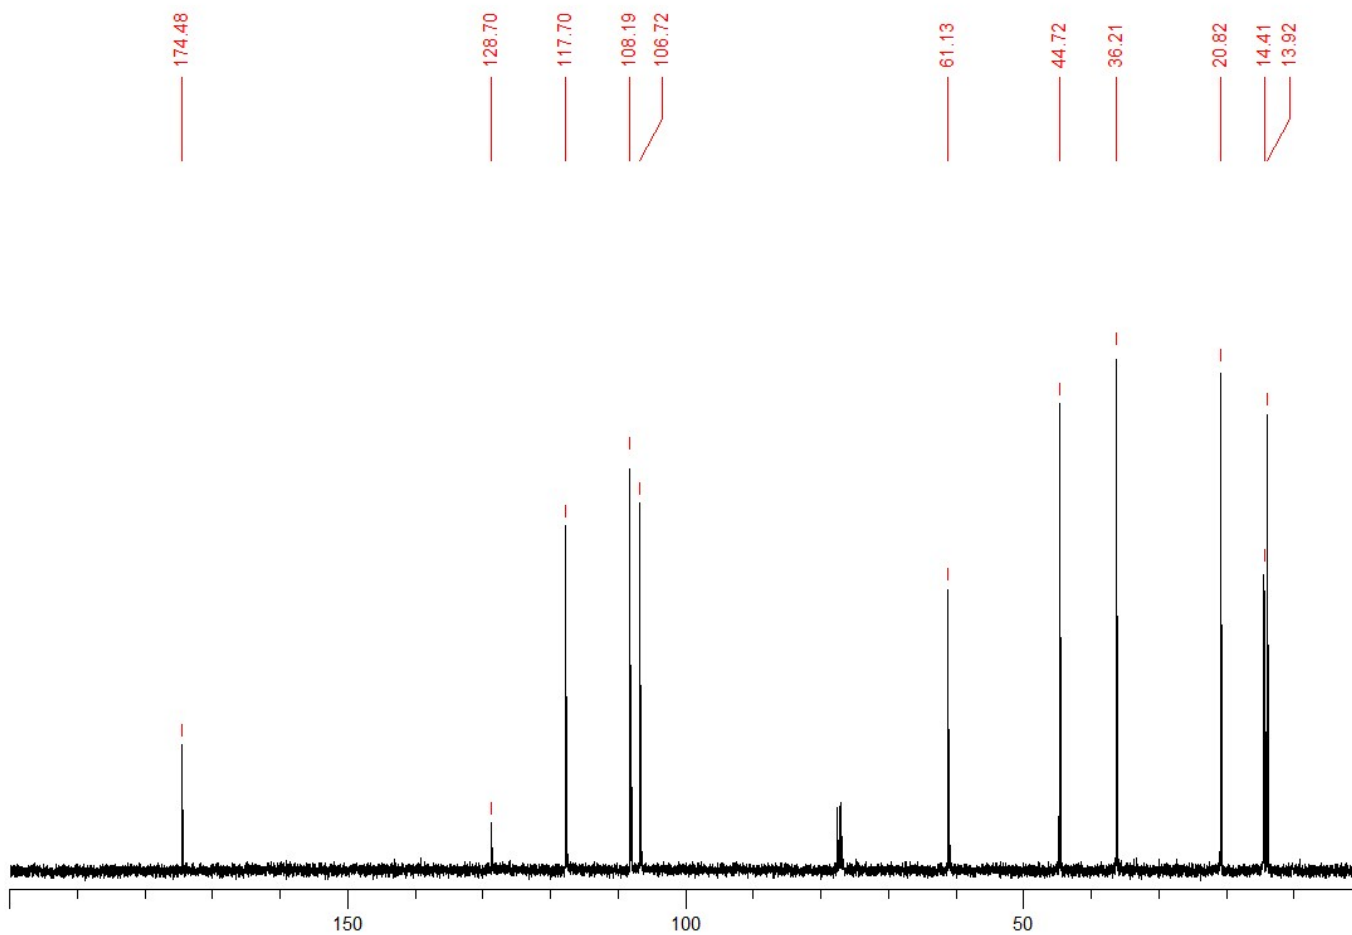

<sup>1</sup>H-NMR Spectra of compounds **6ab**

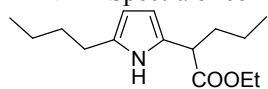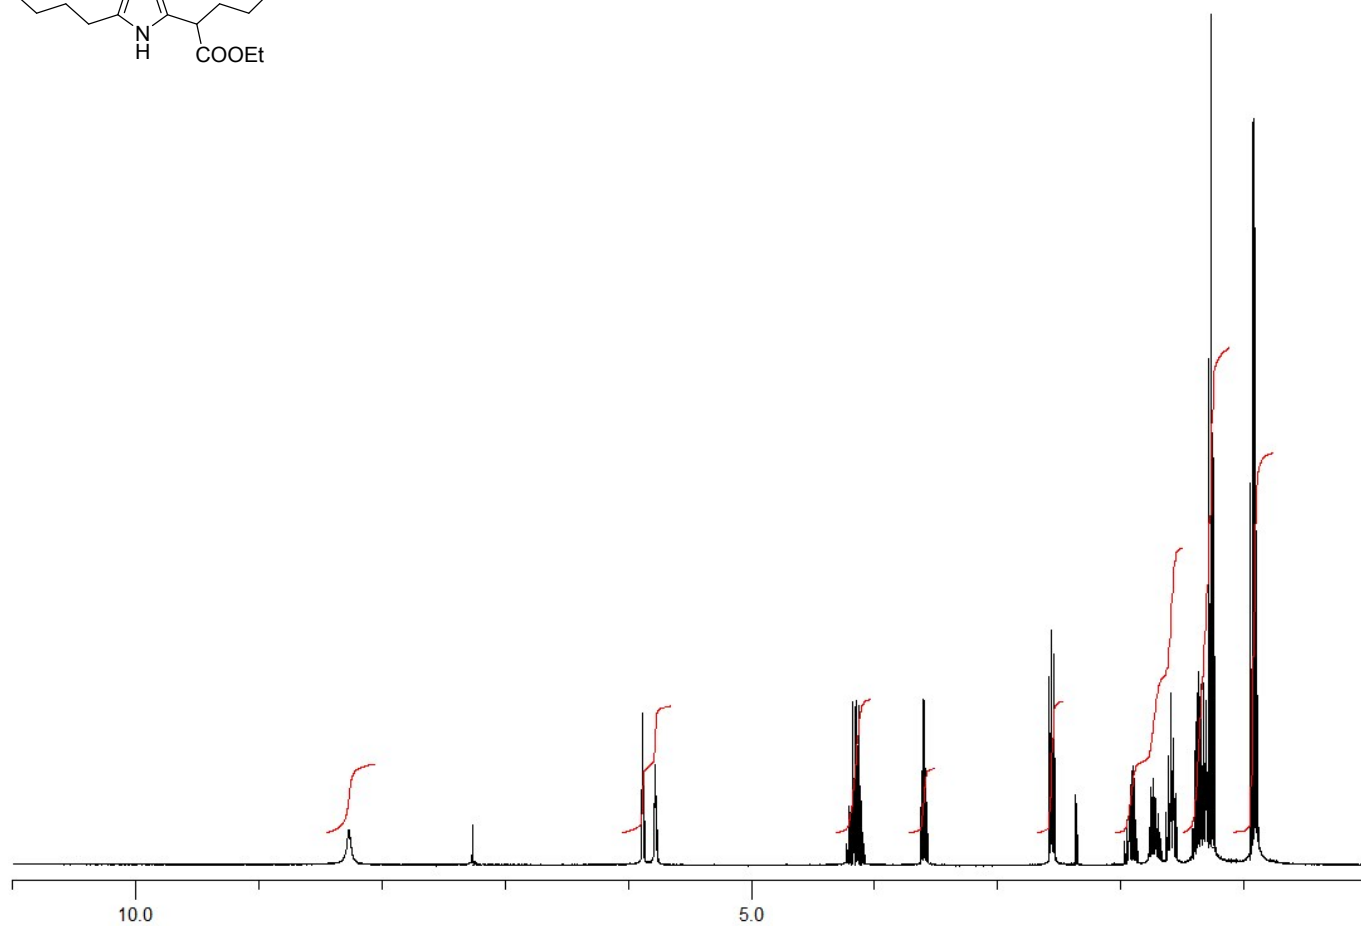

<sup>13</sup>C-NMR Spectra of compounds **6ab**

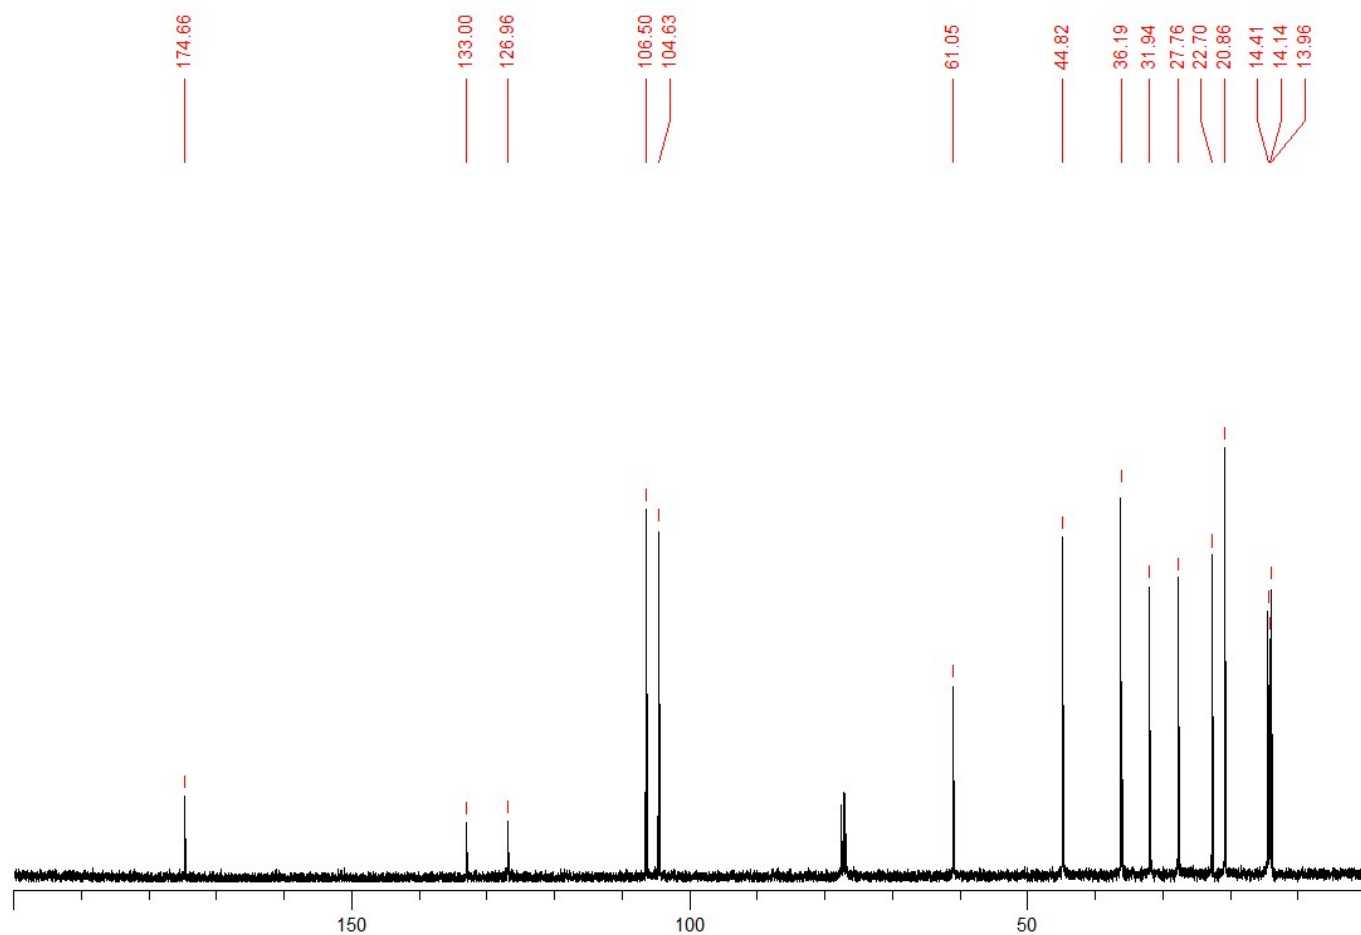

<sup>1</sup>H-NMR Spectra of compounds **6ac**

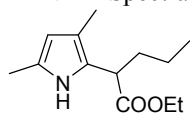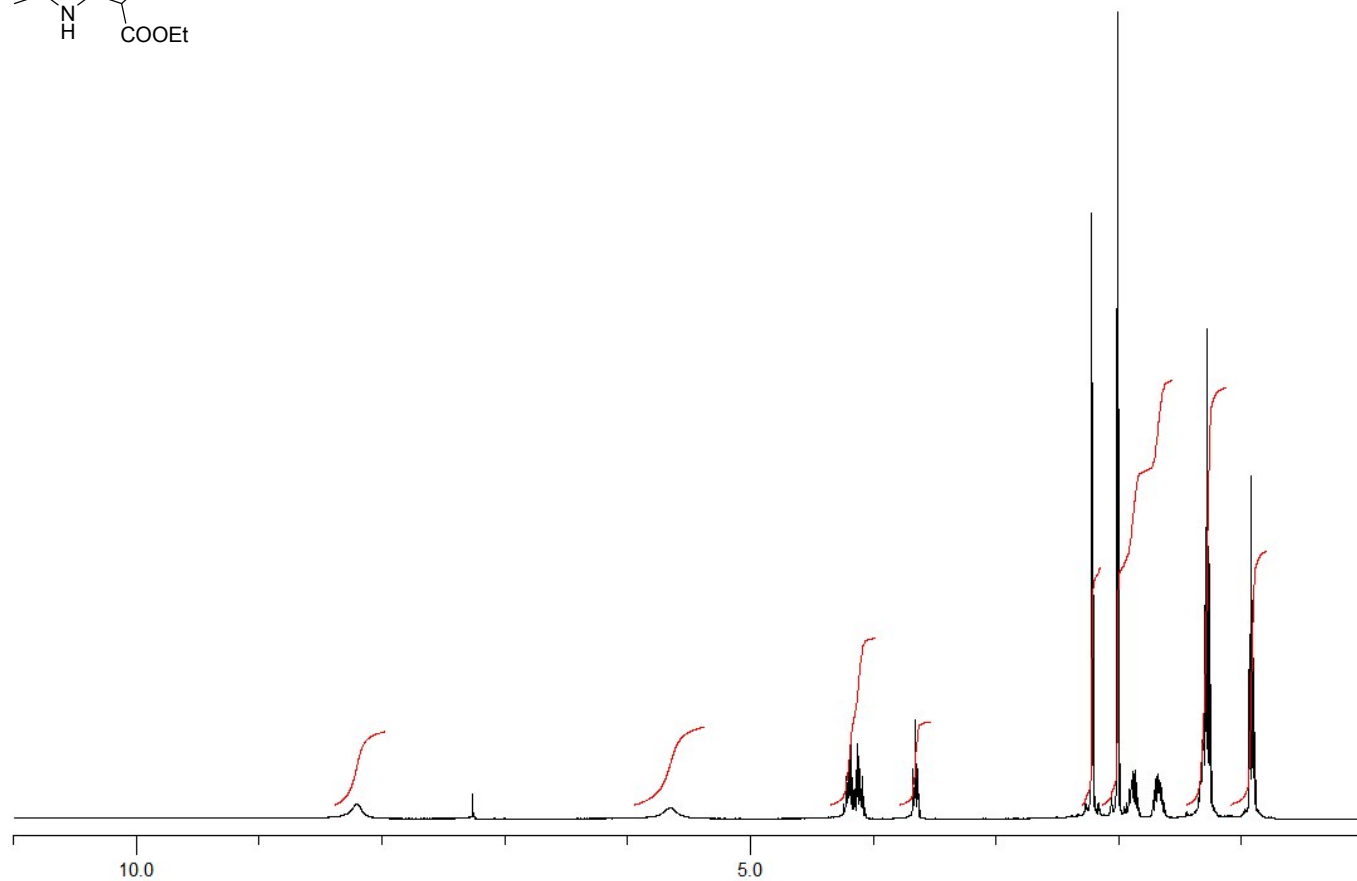

<sup>13</sup>C-NMR Spectra of compounds **6ac**

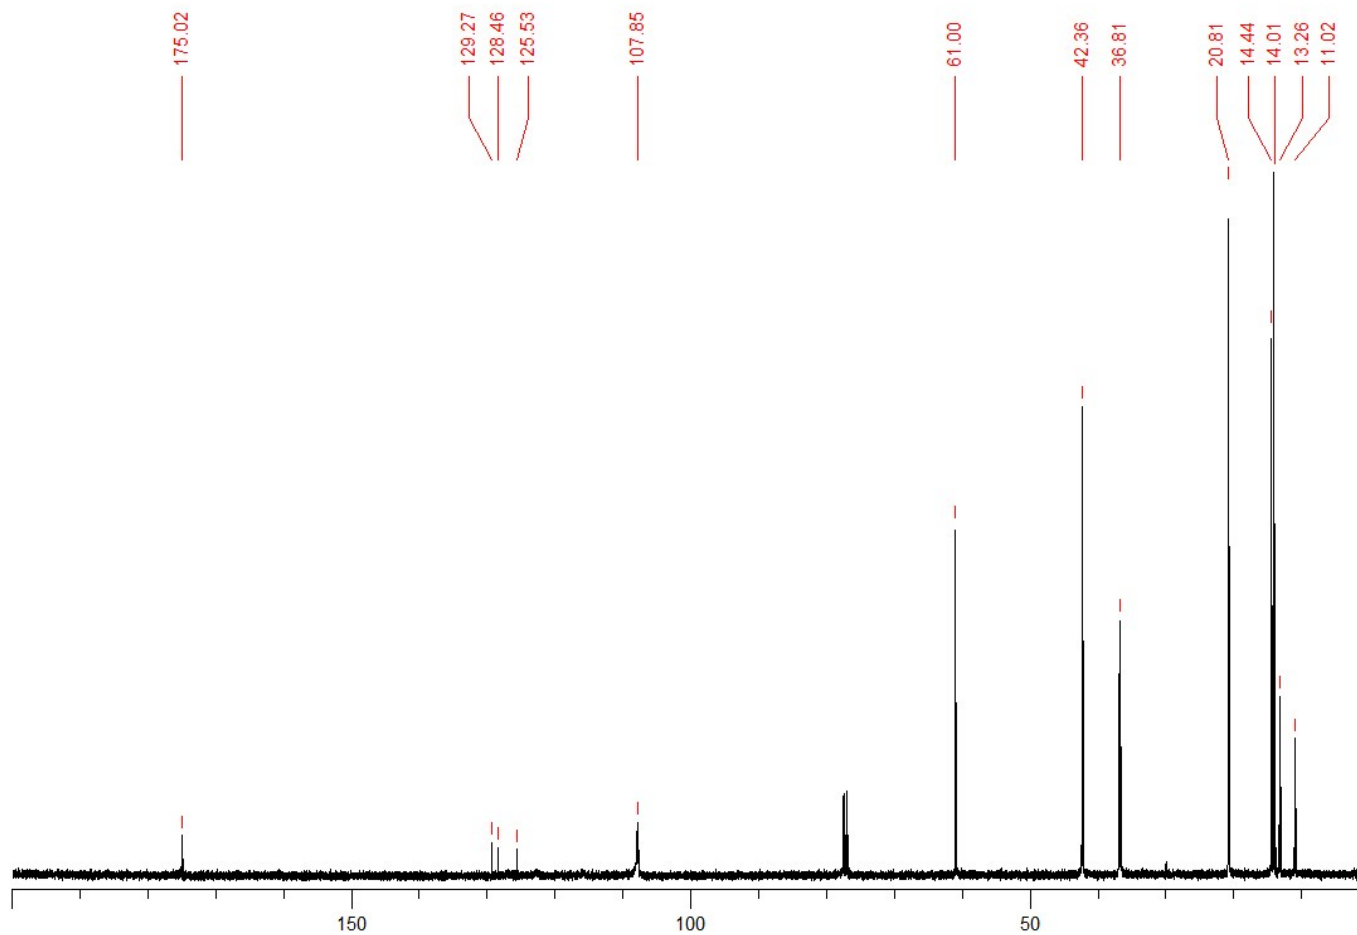

<sup>1</sup>H-NMR Spectra of compounds **6ba**

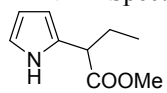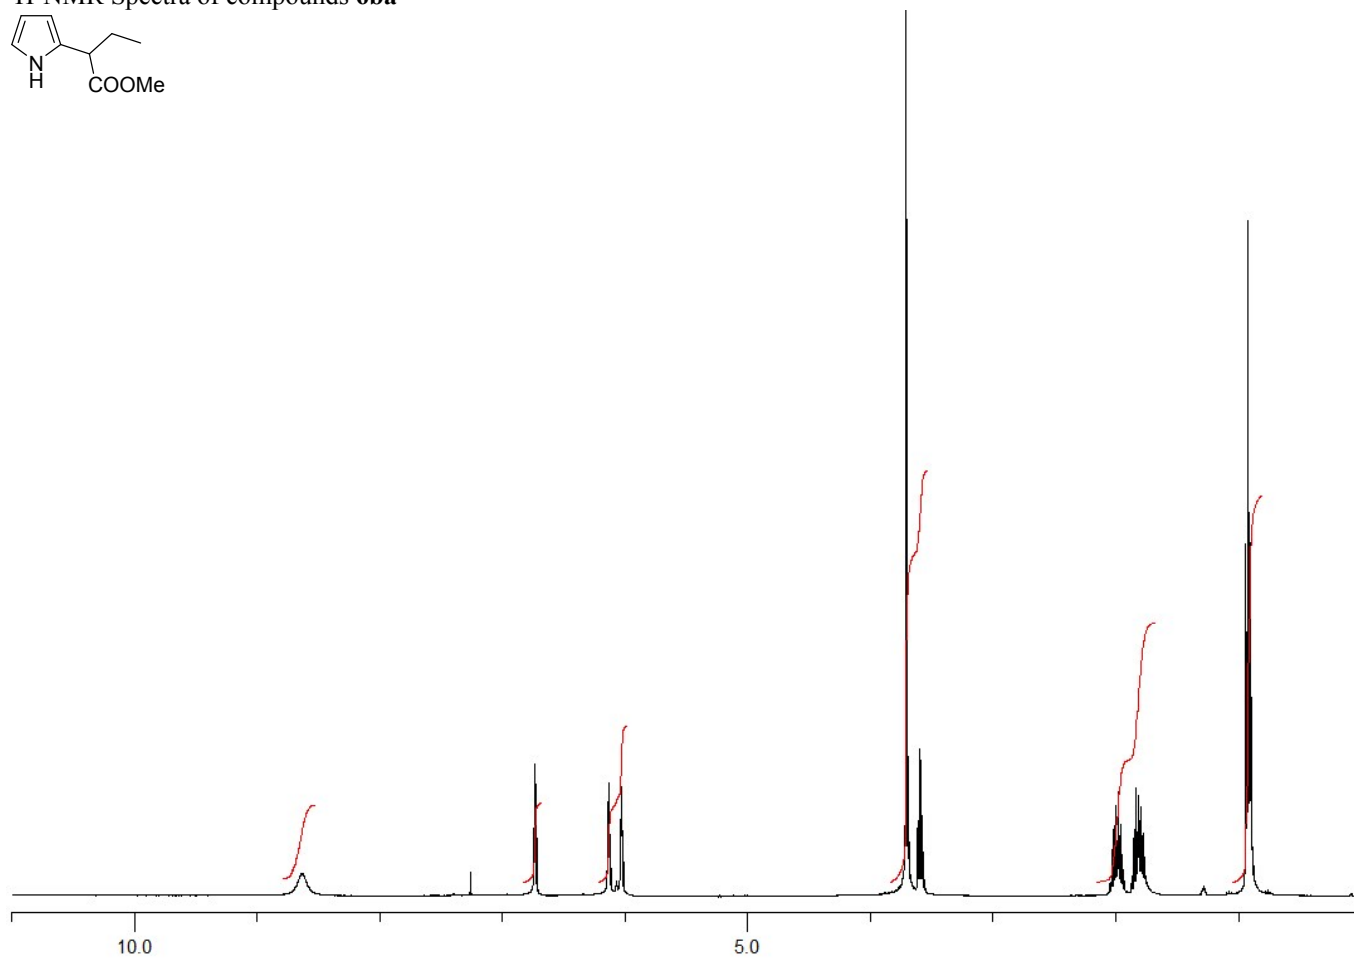

<sup>13</sup>C-NMR Spectra of compounds **6ba**

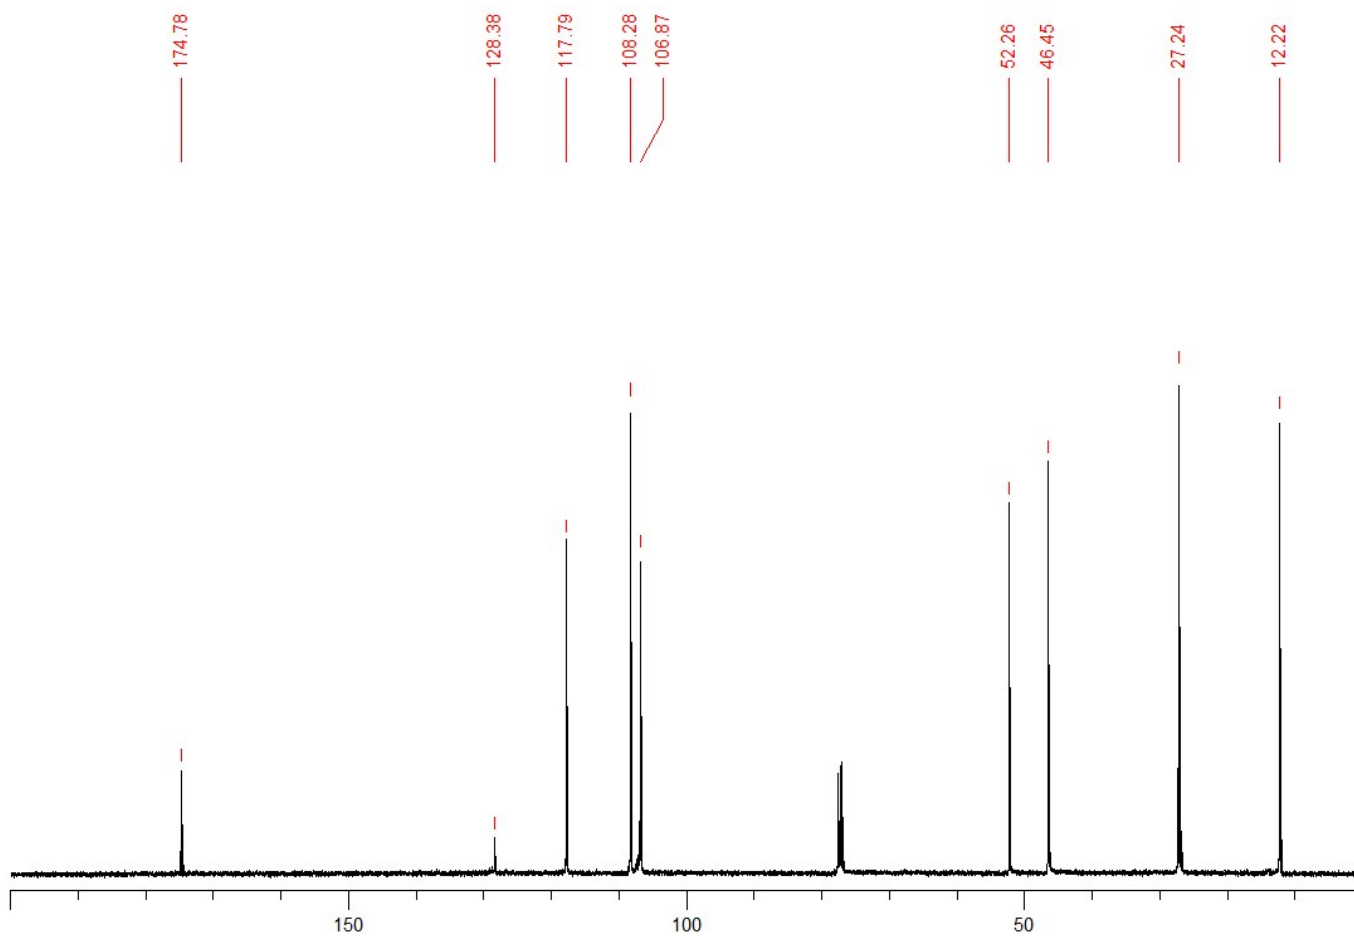

<sup>1</sup>H-NMR Spectra of compounds **6cd**

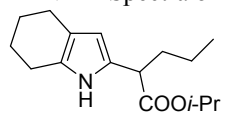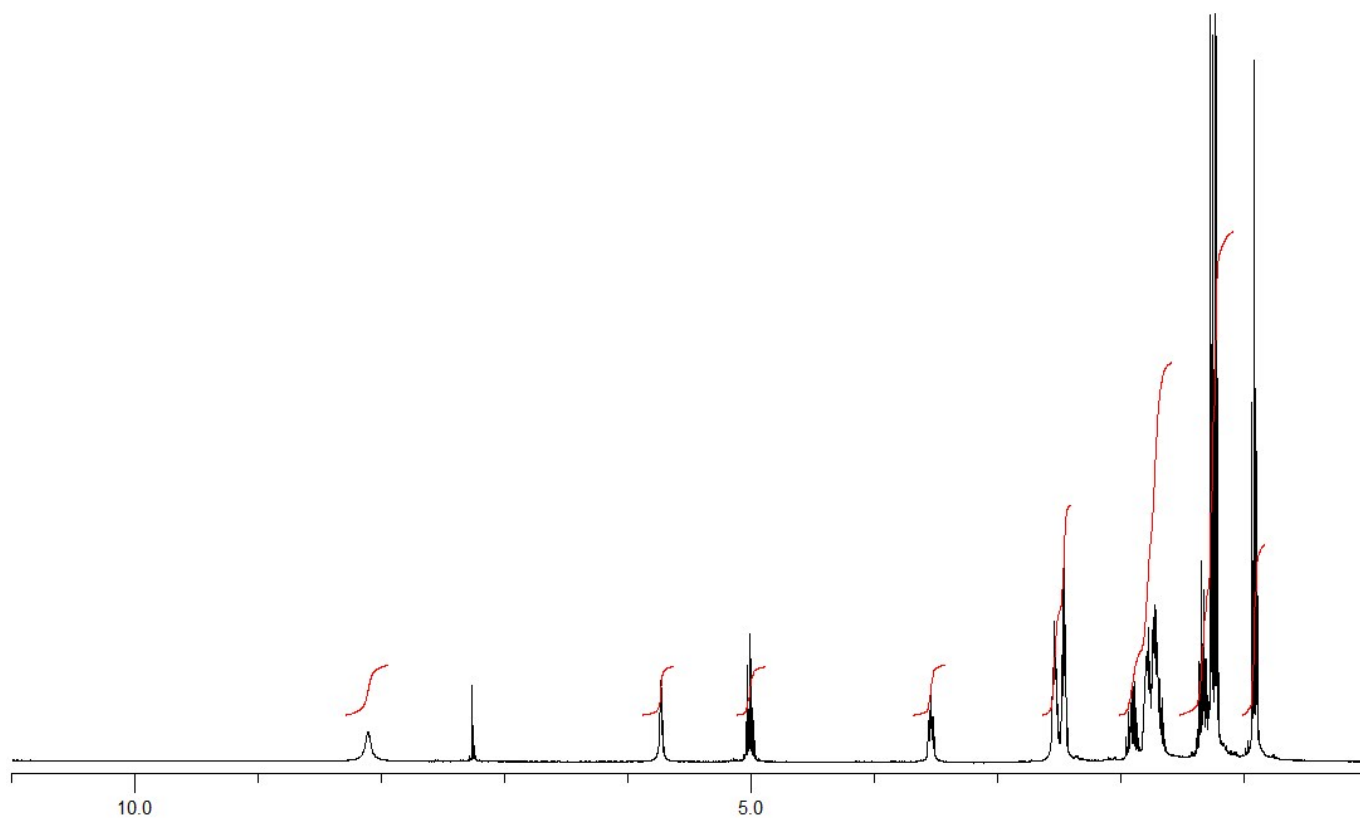

<sup>13</sup>C-NMR Spectra of compounds **6cd**

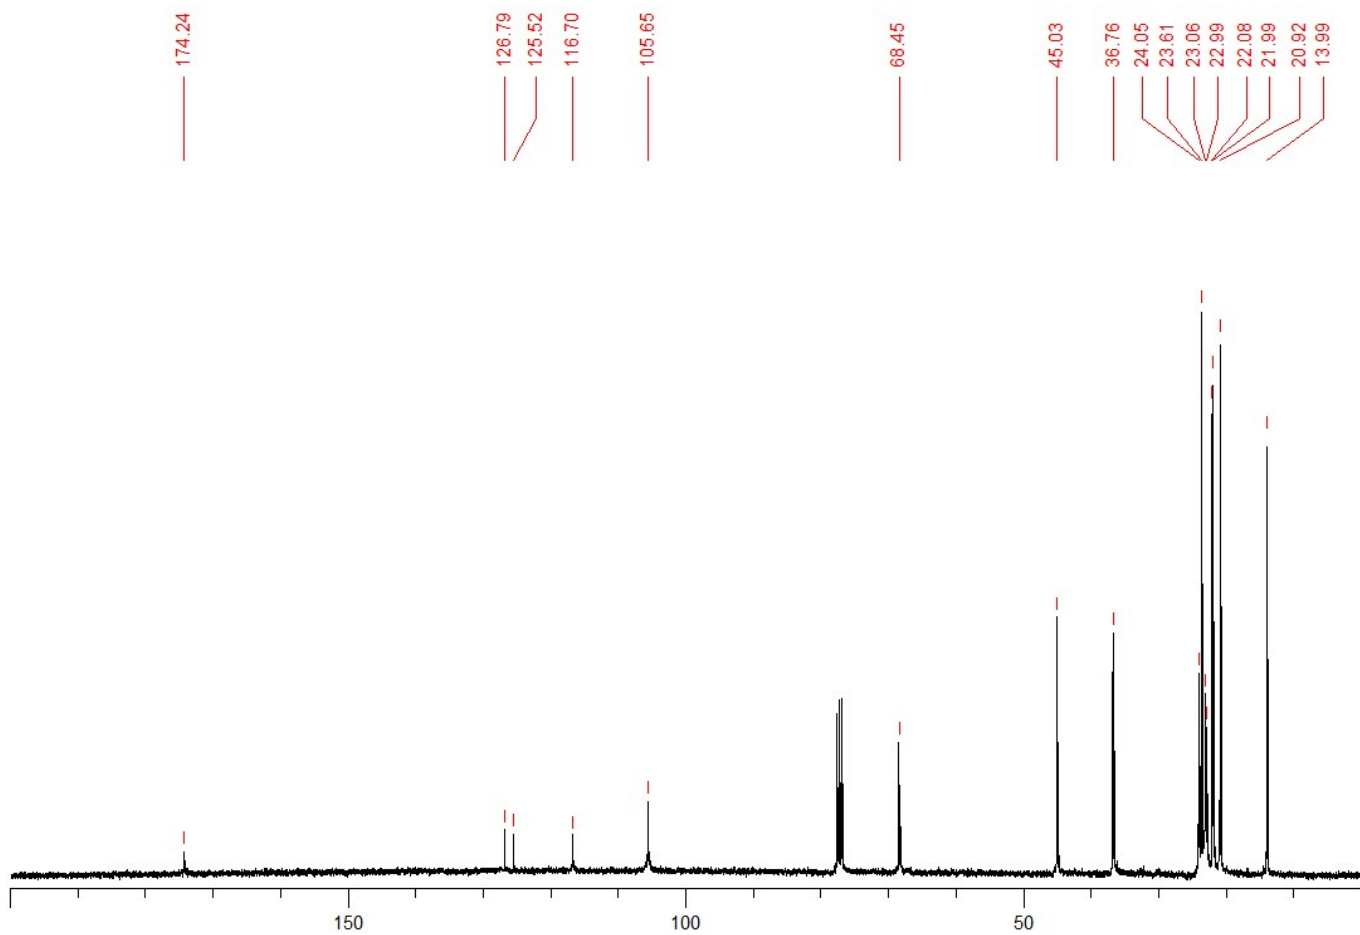

Supplement: c6ra05348c1.pdf [file c6ra05348c1.pdf]
